# Supplementary material
Source: PubMed Central journal article supplement (PMC4627580)
Supplement: NIHMS63149-supplement-1.pdf [file NIHMS63149-supplement-1.pdf]

## SUPPLEMENTARY MATERIALS

### SUMMARY

|                                            |    |
|--------------------------------------------|----|
| SUPPLEMENTARY NOTE .....                   | 3  |
| Empirical evaluation of genomic power..... | 3  |
| Genotyping in the replication cohort.....  | 3  |
| In-depth analyses at known loci.....       | 4  |
| $\beta$ -globin gene cluster .....         | 4  |
| <i>HBS1L-MYB</i> intergenic region.....    | 5  |
| <i>BCL11A</i> .....                        | 6  |
| Gene-gene interaction analyses.....        | 6  |
| $\beta^{039}$ specific analysis.....       | 7  |
| Clinical impact assessment.....            | 8  |
| REFERENCES .....                           | 10 |

### SUPPLEMENTARY FIGURES

|                                                                                                         |    |
|---------------------------------------------------------------------------------------------------------|----|
| Supplementary Figure 1. Empirical evaluation of genomic power upon reference panel population.<br>..... | 13 |
| Supplementary Figure 2. Manhattan and QQ plots for the assessed hemoglobin types. ....                  | 14 |
| Supplementary Figure 3. Regional plots of loci associated with HbA1. ....                               | 16 |
| Supplementary Figure 4. Regional plots of loci associated with HbA2. ....                               | 18 |
| Supplementary Figure 5. Regional plots of loci associated with HbF.....                                 | 22 |

### SUPPLEMENTARY TABLES

|                                                                                                                |    |
|----------------------------------------------------------------------------------------------------------------|----|
| Supplementary Table 1. Characteristics of the studied cohort. ....                                             | 26 |
| Supplementary Table 2. Association results for the $\beta^{039}$ and $-\alpha$ 3.7 deletion type I.....        | 27 |
| Supplementary Table 3. Joint-association analysis results for loci with multiple associated variants.<br>..... | 28 |
| Supplementary Table 4. Validation of top genome-wide findings. ....                                            | 29 |

|                                                                                                                                                                                                      |    |
|------------------------------------------------------------------------------------------------------------------------------------------------------------------------------------------------------|----|
| Supplementary Table 5. Functional annotation of signals reported in Table 1. ....                                                                                                                    | 30 |
| Supplementary Table 6. Association results at SNPs previously associated with hemoglobin or red blood cell indices.....                                                                              | 31 |
| Supplementary Table 7. Genome-wide significant signals using 1000 Genomes phase III as reference panel.....                                                                                          | 37 |
| Supplementary Table 8. Evidence of relationships between suggestive and genome-wide significant loci.....                                                                                            | 38 |
| Supplementary Table 9. Markers associated with suggestive p-values to a single trait and demonstrating genome-wide significant pleiotropic effects considering between-trait combined p-values. .... | 39 |
| Supplementary Table 10. Summary of Extended Association for $\beta^{039}$ .....                                                                                                                      | 40 |
| Supplementary Table 11. Effects of genome-wide significant loci in males and females.....                                                                                                            | 41 |

## SUPPLEMENTARY NOTE

### Empirical evaluation of genomic power

To represent the additional power gained by the sequencing effort in the SardiNIA cohort, we empirically evaluated the power provided by imputation with different reference panels. When imputing the SardiNIA cohort using either the Sardinian reference panel or the 1000 Genomes reference panel phase III (version 5)<sup>1</sup>, imputation quality metrics vary drastically for low frequencies. Consequently, the effective sample size available for discovery, defined by the number of samples multiplied by imputation accuracy metric, is reduced. We therefore calculated, for different frequency ranges, the power to detect a variant taking into account the resulting effective sample sizes, multiplying  $N$  for the average imputation accuracy of variants in each frequency range (as presented in **Supplementary Figure 1**). We selected SNPs that passed imputation accuracy filters in both imputation runs as described in Pistis et al., 2014<sup>2</sup>, and separately analysed SNPs present in both panels and those specific to each panel. We consider the SardiNIA cohort roughly equivalent to a group of 3,000 unrelated individuals, and estimated that for a trait following a normal distribution this sample has 80% power to detect a variant explaining 1.3% of the variance at a  $5 \times 10^{-8}$  level of significance. If imputation accuracy were perfect for all variants, power to detect a variant with this effect size would be 80% for all frequency ranges. Taking into account the effect of imperfect genotype inference on effective sample size, power drops slightly below 80% only for rare variants (MAF <0.5%) when imputation is performed with the Sardinian panel, while a substantial decrease is notable even for variants with MAF <5% when 1000 Genomes data are used for imputation. For variants that are only imputable using the Sardinian panel, power is obviously 0% with the 1000 Genomes panel. For such variants, average imputation accuracy is high for variants with MAF  $\geq 0.5\%$ , and estimated power remains over 60% (see **Supplementary Figure 1**). By contrast, for variants that are only imputable using the 1000 Genomes panel, power is below 60% even for more frequent alleles (MAF <5%).

### Genotyping in the replication cohort

Replication tests were performed in the TwinsUK cohort<sup>3</sup>. Genotyping was performed using a combination of Illumina arrays (HumanHap300, HumanHap610Q, 1M-Duo and 1.2MDuo 1M). Normalized intensity data were pooled for each of the three arrays separately (with 1M-Duo and 1.2MDuo 1M pooled together). For each dataset, the Illuminus calling algorithm was used to assign genotypes in the pooled data. No calls were assigned if an individual's most likely genotype was called with less than a posterior probability threshold of 0.95. Validation of pooling was achieved via visual inspection of 100 randomly selected shared SNPs for overt batch effects. Finally, intensity cluster plots of significant SNPs were visually inspected for overdispersion biased no calling and/or erroneous genotype assignment. SNPs exhibiting any of these characteristics were discarded. Quality control filters were applied to each of the three datasets separately. Specifically, samples were excluded if 1) sample call rate <98%; 2) heterozygosity across all SNPs

$\geq 2$  standard deviations from the sample mean; 3) evidence of non-European ancestry as assessed by PCA comparison with HapMap3 populations; 4) observed pairwise IBD probabilities suggestive of sample identity errors; or 5) misclassified monozygotic and dizygotic twins based on IBD probabilities were corrected. SNPs were excluded if 1) Hardy-Weinberg  $p$ -value  $< 1 \times 10^{-6}$ , assessed in a set of unrelated samples; 2) MAF  $< 1\%$ , assessed in a set of unrelated samples; or 3) SNP call rate  $< 97\%$  (SNPs with MAF  $\geq 5\%$ ) or  $< 99\%$  (for  $1\% \leq$  MAF  $< 5\%$ ). Alleles of all three datasets were aligned to HapMap2 or HapMap3 forward strand alleles. Data sets were then combined into a unique set.

Prior to merging, we performed pairwise comparison among the three datasets and further excluded SNPs and samples to avoid spurious genotyping effects, identified as follows: 1) concordance at duplicate samples  $< 1\%$ ; 2) concordance at duplicate SNPs  $< 1\%$ ; 3) visual inspection of QQ plots for logistic regression applied to all pairwise dataset comparisons; (iv) Hardy-Weinberg  $p$ -value  $< 1 \times 10^{-6}$ , assessed in a set of unrelated samples; or (v) observed pairwise IBD probabilities suggestive of sample identity errors. During merging, we selected the largest array for individuals typed with two different arrays. The merged dataset consists of 5,654 individuals (2,040 from the HumanHap300, 3,461 from the HumanHap610Q and 153 from the HumanHap1M and 1.M arrays) and up to 874,733 SNPs depending on the dataset (HumanHap300: 303,940, HumanHap610Q: 553,487, HumanHap1M and 1.M: 874,733).

### In-depth analyses at known loci

#### *$\beta$ -globin gene cluster*

Thalassemia and different hematological diseases are caused by genetic variation in this genomic region, which has been intensively studied in the past decades. However, our results suggest that some of the polymorphisms identified here are more functionally relevant than what already described. To evaluate whether our best association signal, rs67385638, was driven by any previously reported association, we corrected the association analysis using 40 previously correlated markers ( $r^2 \leq 0.80$ ):

- 3 variants found within the (AT) $\times$ (T) $y$  motif (within 5248828-5248852bp),
- 2 markers of the intergenic region containing the *HBD-HBG1* haplotypes (5258827-5259219bp),
- rs57966301 and rs2855039 from the pre-*HBG1* haplotype,
- the XmnI polymorphism (rs7482144), rs2855122 and rs2855121 from the pre-*HBG2* haplotype,
- 9 variants within the 3'HS, 5'HS1, 5'HS2, 5'HS3, 5'HS4 and 5'HS5 of the  $\beta$ -globin gene cluster (considering boundaries 5225972-5226553bp, 5297046-5297919bp, 5301801-5302172bp, 5305887-5306107bp, 5309436-5309702bp and 5312654-5312760bp respectively),
- and 21 variants from the ERV-9 5' LTR region (5314490-5316184bp).

Even after adding these 40 markers as covariates together with age, age<sup>2</sup>, gender and  $\beta^0$  mutations, rs67385638 was still the most associated marker ( $p = 3.10 \times 10^{-07}$ ). Three previously correlated markers not used as covariates because of their  $r^2 > 0.80$  with rs67385638, showed

weaker evidence of association (rs2855039 with  $p=1.6 \times 10^{-05}$ , rs2855121 with  $p=6.5 \times 10^{-05}$  and rs7482144 with  $p=2.2 \times 10^{-04}$ ). Noteworthy, rs67385638 is more strongly associated than the classically reported XmnI polymorphism.

In the same region, we identified an independently associated variant rs2855122. This variant along with rs2855121 and rs10128653, are known to define the pre-Ggamma haplotype, previously associated with variations of HbF levels in sickle cell and  $\beta$ -thalassemia patients<sup>4</sup>. However rs10128653 is monomorphic in the Sardinia cohort. We hypothesized that our 2 genome-wide associated signals, rs67385638 and rs2855122, could better describe the variation of HbF levels in our cohort than the pre-Ggamma haplotypes. Therefore we tested, on 1,164 unrelated individuals, both the pre-Ggamma haplotype (here rs2855122 and rs2855121) and the haplotype formed by rs67385638 with rs2855122, estimating the contribution to variability of all possible allelic configurations at each haplotype (omnibus test in pLink)<sup>5</sup>. We observed that the haplotype we newly construct indeed correlates more strongly with HbF variations ( $p=1.1 \times 10^{-04}$  versus  $7.1 \times 10^{-04}$ ). This is in line with 1) the fact that rs2855122 was not nominally significant before conditioning on rs67385638 ( $p=0.1363$ ), possibly indicating a combined action of these two variants, and 2) functional annotations of these 2 markers, showing evidence of chromatin interactions and RNA Polymerase II binding in K562 cell-lines between the regions containing these 2 markers (chr11:5274899..5283703-chr11:5287409..5292802,11 and chr11:5273135..5283072-chr11:5287409..5292550,13 from ENCODE/GIS-Ruan K562 Pol2 ChIA-PET Interactions)<sup>6</sup>. This further supports the notion that they jointly contribute to the transcription of gamma-globin and/or switching between fetal to adult globins.

As for marker rs67385638, it is predicted to introduce a binding site for C-EBP-beta by ALGEN-PROMO<sup>7,8</sup> and a CP2 binding site by TFSEARCH<sup>9</sup> engines. It has already been reported that at the G-CRE site where the independent signal lies, CREB-1 interacts with transcription factors of the basic Leucine Zipper family, of which C-EBP-beta is a member<sup>10</sup>. CP2 is known to be involved in transcriptional activation of the human gamma-globin genes in erythroid cells as part of the stage selector protein complex that activates gamma and epsilon globin gene expression<sup>11,12</sup>.

Finally, rs2855122 has also been implicated in gamma-globin expression induced by histone deacetylase inhibitors<sup>10,13</sup>. Because its C allele is associated with both a decrease of HbF and an opposite increase of HbA1 and HbA2, rs2855122 is a particularly strong candidate for a primary effect on the fetal to adult hemoglobin switch, and eventually as a predictor of inter-individual variation in drug response to histone deacetylase inhibitors.

#### *HBS1L-MYB intergenic region*

In our GWAS results, with SNPs imputed using the Sardinian sequencing data, the top signals at this locus coincide for HbA2 and HbF (locus 4 in **Supplementary Figure 4** and locus 2 in **Supplementary Figure 5**), at SNP rs9399137. When using the 1000 Genomes phase III<sup>1</sup> imputation panel, and therefore assessing both SNPs and indels, these signals showed the same statistical evidence for association of the well-known 3bp TAC deletion rs66650371 ( $p=1.0 \times 10^{-82}$  for HbF and  $p=2.0 \times 10^{-20}$  for HbA2). We noticed that the previously reported most associated marker<sup>14</sup>, rs7775698, overlaps with the deletion. On the sequenced samples, we investigated both SNPs and the deletion status, looking at raw read count and alignment, and compared genotypes with those

called using ExomeChip. Among the sequenced individuals, only a small fraction carried the SNP (MAF = 0.003) while a larger fraction carried the deletion (MAF = 0.163). Genotypes from the array instead indicate all samples bearing the deletion as carriers of SNP. Therefore we can predict that results previously reported for this SNP could be biased by the presence of the deletion.

Finally, we tested interaction terms of rs66650371 and rs11754265 with all markers in the intergenic region, and rs11754265 demonstrated highly significant interaction terms with different markers upstream or within *MYB* (rs62429816 with  $p=3.2 \times 10^{-12}$ , rs9389278 with  $p=2.7 \times 10^{-11}$  and rs7744765 with  $p=3.0 \times 10^{-11}$ ). This element could support long range interaction evidences observed in previous studies<sup>15,16</sup>, and the detection of an independent signal with stronger evidences of eQTL than the lead variant could reconcile previous findings of a region containing eQTLs for *HBS1L*<sup>17</sup> but with *MYB* as a modifier of HbF levels<sup>18</sup>.

### *BCL11A*

In the second intron of *BCL11A* gene, the top 3 signals are in strong LD and hardly distinguishable: rs4671393 with  $p=2.596 \times 10^{-130}$ , rs766432 with  $p=1.825 \times 10^{-129}$  ( $r^2=0.96$  with rs4671393) and rs1427407 with  $p=5.597 \times 10^{-129}$  ( $r^2=0.92$  with rs4671393). Conditioning on each of these 3 markers results point to 2 independent signals in high LD ( $r^2=0.94$ ): rs13019832 with  $p=9.122 \times 10^{-33}$  and rs7606173 with  $p=6.092 \times 10^{-33}$  respectively.

From all 2-markers combinations including one top and its independent signal the lowest non-nominally significant residual variance for the other variants of these 7 were obtained when conditioning on both rs4671393 and rs13019832 and when conditioning on both rs1427407 and rs7606173. The difference was beyond the limit of accurate phenotype determination of the present study, so that discriminating between the different possible combinations is difficult. The analysis of joint effects at this locus shows that the p-value for rs4671393 drops from  $2.60 \times 10^{-130}$  to  $3.00 \times 10^{-76}$  when taking into account the effect of rs13019832, so that complex synthetic associations may also be present (see **Supplementary Table 3**).

### Gene-gene interaction analyses

Using the *lmekin()* function from the “Kinship” R package<sup>19</sup>, we tested for interactions involving genome-wide significant variants as reported in **Table 1** plus  $\beta^{039}$ ,  $-\alpha$  3.7 deletion type I (NG\_000006.1:g.34164\_37967del3804), age and gender. To declare significance we used a Bonferroni significance threshold of  $1.67 \times 10^{-04}$  (corresponding to 300 interactions). We found significant evidence for 16 interactions, mostly involving variants in the  $\beta$  and  $\alpha$  globin genes clusters. Specifically:

- for HbA1, between  $\beta^{039}$  and variants in the  $\alpha$ -globin gene cluster (with  $-\alpha$  3.7 deletion type I at  $p=3.6 \times 10^{-20}$ , with rs570013781 at  $p=3.8 \times 10^{-26}$ , with rs141494605 at  $p=1.3 \times 10^{-28}$  and with chr16:391593 at  $p=7.1 \times 10^{-06}$ );
- for HbA2 between  $\beta^{039}$  and variants in the  $\alpha$ -globin gene cluster (with  $-\alpha$  3.7 deletion type I at  $p=2.3 \times 10^{-15}$ , with rs570013781 at  $p=3.7 \times 10^{-23}$ , with rs141494605 at  $p=5.2 \times 10^{-26}$ ) and with chr16:391593 at  $p=4.2 \times 10^{-05}$ ), as well as between SNP rs7944544 in the *HBD-HBG* intergenic region and SNP rs141494605 in the  $\alpha$ -globin gene cluster  $p=3.9 \times 10^{-05}$ );

- for HbF between  $\beta^{039}$  and variants in the  $\alpha$ -globin gene cluster (with rs570013781 at  $p=1.19 \times 10^{-07}$ , with rs141494605 at  $p=5.6 \times 10^{-06}$ , and with rs67385638 at  $p=7.55 \times 10^{-06}$ ), as well as between the *HBS1L-MYB* region and SNPs in the *HBG2-HBE1* region (rs9399137 with both rs67385638 ( $p=2.7 \times 10^{-05}$ ) and rs2855122 ( $p=1.4 \times 10^{-04}$ )).

Among interactions involving one SNP and either age or gender, only the interaction between  $\beta^{039}$  and gender passed the threshold for significance for HbA1 ( $p=1.1 \times 10^{-16}$ ) and HbA2 ( $p=8.1 \times 10^{-07}$ ). As for age and gender, 2 interactions were nominally significant between rs570013781 and gender ( $p=6.3 \times 10^{-03}$ ) for HbA1 and between rs13019832 and gender ( $p=2.3 \times 10^{-02}$ ) for HbF. For completeness, we also report all effects observed separately in males and females in **Supplementary Table 11**, for which no locus had significant heterogeneity after Bonferroni correction.

### $\beta^{039}$ specific analysis

In addition to the 3 hemoglobins, we tested 69 additional non-hematological phenotypes available from the SardiNIA study for association with  $\beta^{039}$ . All traits were normalized using inverse normal transformation and age, age<sup>2</sup> and gender as covariates. The results were considered significant after Bonferroni correction for the 69 tests (critical alpha =  $7.0 \times 10^{-04}$ ), and are presented in **Supplementary Table 10**. Each of the tabulated traits was measured in 5,949 except for eosinophil counts (5,823 individuals).

The full list of additional tested traits (defined and measured as in Pilia et al., 2006)<sup>20</sup> is as follow:

|                                             |                                        |
|---------------------------------------------|----------------------------------------|
| Adiponectin (mg/mL)                         | Fibrinogen (mg/dL)                     |
| Vitamin B12 (pg/ml)                         | Gamma-glutamyltransferase (GGT) (U/L)  |
| Folate (ng/ml)                              | Serum glucose level (mg/dL)            |
| Homocysteine (umol/L)                       | HDL cholesterol (mg/dL)                |
| High sensitivity C-reactive protein (ug/mL) | Serum insulin level (U/mL)             |
| IL6                                         | C-reactive protein (mg/dL)             |
| Leptin (pg/mL)                              | Potassium (mEq/L)                      |
| MCP1 (pg/mL)                                | PSA (microU/L)                         |
| VCAM (ng/ml)                                | Iron (microU/L)                        |
| Thyroid Antithyroglobulin Antibody          | Sodium (mEq/L)                         |
| Anti-thyroglobulin                          | Transferrin (mg/dL)                    |
| Basophils (%)                               | Triglycerides (mg/dL)                  |
| BMI                                         | Erythrocyte sedimentation rate (mm/h)  |
| Diastolic diameter                          | Height                                 |
| Systolic diameter                           | Anthropometric: Hip circumference (cm) |
| Diastolic Blood Pressure                    | Serum insulin level (U/mL)             |
| Platelets count                             | Low-density lipoprotein                |
| WBC ( $10^3$ /ul) White Blood Cells         | Lymphocytes (%)                        |
| Eosinophils (%)                             | Mean blood pressure                    |
| Uric acid (mg/dL)                           | Monocytes (%)                          |
| Alanine aminotransferase (ALT) (U/L)        | Neutrophils (%)                        |
| Aspartate aminotransferase (U/L)            | Pulse pressure                         |
| Bun (mg/dL)                                 | Normalized PWV                         |
| Fractionated bilirubin (mg/dL)              | PWV: Pulse wave velocity               |
| Total bilirubin (mg/dL)                     | Supine Blood Pressure 1st systolic     |
| Total cholesterol (mg/dL)                   | Total IgE                              |
| Serum creatinine level (mg/dL)              | Thyroid-stimulating hormone            |

|                            |                        |
|----------------------------|------------------------|
| Waist                      | Peak systolic velocity |
| Wall Lumen Ratio           | Acceleration time      |
| Weight                     | Pulsatile Index        |
| Carotid Doppler:           | Vascular Mass          |
| CCA intima media thickness | ECG:                   |
| End diastolic velocity     | QTc interval           |
| Integral time velocity     | Heart rate             |
| Systolic diastolic ratio   | PR                     |

### Clinical impact assessment

To assess the possible impact of the genome-wide significant variants on disease severity, we used a cohort of retrospectively studied  $\beta$ -thalassemia patients comprising 306 unrelated Sardinian individuals followed at the “Microcitemico” Hospital in Cagliari (153 females and 153 males). Of these patients, 45 had thalassemia intermedia (patients that never needed regular blood transfusion), and all were homozygous for the  $\beta^{039}$  mutation, which accounts for 96% of  $\beta$ -thalassemia alleles in Sardinia<sup>21</sup>. The age at which patients started regular transfusions was used as an indicator of hematological severity – ranging from 14 patients who began transfusion within the first 2 months of life to the 45 patients who never needed transfusions. Criteria to start transfusion were 1) hemoglobin level < 7 g/dl for more than 2 weeks in absence of infections, 2) moderate to severe spleen enlargement, and 3) initial skeletal changes and/or poor growth. Patients were considered as regularly transfused when undergoing more than 8 blood transfusions per year. The full cohort was genotyped using Affymetrix 6.0 microarray; quality of samples and genotypes were carefully assessed through sample and marker missing rates, deviation from Hardy-Weinberg equilibrium, and minor allele frequency (MAF), resulting in 602,036 autosomal markers available for imputation. As for the SardinIA cohort, imputation was performed using Minimac<sup>22</sup> and the Sardinian whole-genome sequenced samples as reference panel, with genotypes pre-phased using MACH<sup>23</sup>.

Among the 23 unique variants associated with different hemoglobins in the general population, all samples were homozygous for the  $\beta^{039}$  mutation while for the  $\alpha$ -globin genes we considered the –  $\alpha$  3.7 deletion type I as well as rs111033603 and rs41474145, determined using GAP-PCR or restriction enzyme digestion. Of the remaining 21 unique variants reported in **Table 1**, two (rs141006889 and rs148706947) were excluded because imputation RSQR was <0.50 and no acceptable surrogates were found. For two variants, rs5030868 (on the X chromosome, neither genotyped nor imputed) and rs11036338 (RSQR<0.50), we used the best available surrogates: for the first, rs4898455 (genotyped,  $r^2=0.6$ ,  $p=5.9 \times 10^{-08}$  for HbA1) and for the second, rs10837584 (imputed with RSQR=0.999,  $r^2=0.9$ ,  $p=8.2 \times 10^{-12}$  for HbA2). The available 19 SNPs, plus gender and  $\alpha$ -globin gene defects forced as covariates, were considered in fitting a Cox proportional hazards model using a conditional backward procedure to iteratively remove the least significant variable at each step until all remaining variants were at least nominally significant.

This analysis identified 6 variants as significant predictors of the age at transfusion: marker chr16:391593 at the  $\alpha$ -globin gene cluster ( $p=0.008$ , Hazard Ratio (HR) = 2.56); rs67385638 and rs12793110 at the  $\beta$ -globin gene cluster ( $p=0.005$  with HR=3.01 and  $p=0.038$  with HR=0.014 respectively); rs4671393 within the *BCL11A* gene ( $p=1.1 \times 10^{-8}$ , HR=2.143); rs9399137 in the *HBS1L*-



*MYB* intergenic region ( $p=1.8 \times 10^{-4}$ , HR=1.531); and rs59329875 in the *PLTP-PCIF1* intergenic region ( $p=0.036$ , HR=0.793). Among these variants, 3 (chr16:391593, rs67385638, and rs12793110) are new variants at loci already associated to  $\beta$ -thalassemia severity<sup>24,25</sup> and one revealed a new locus associated with  $\beta^0$ -thalassemia severity (rs59329875 at *PLTP-PCIF1*; whose association with HbA2 was replicated in the TwinsUK<sup>3</sup> cohort with  $p=6.98 \times 10^{-6}$ ).

## REFERENCES

1. Consortium, T. 1000 G. P. An integrated map of genetic variation from 1,092 human genomes. *Nature* **491**, 56–65 (2012).
2. Pistis, G. *et al.* Rare variant genotype imputation with thousands of study-specific whole-genome sequences: implications for cost-effective study designs. *Eur. J. Hum. Genet. EJHG* (2014). doi:10.1038/ejhg.2014.216
3. Moayyeri, A., Hammond, C. J., Valdes, A. M. & Spector, T. D. Cohort Profile: TwinsUK and Healthy Ageing Twin Study. *Int. J. Epidemiol.* **42**, 76–85 (2013).
4. Pissard, S. & Beuzard, Y. A potential regulatory region for the expression of fetal hemoglobin in sickle cell disease. *Blood* **84**, 331–338 (1994).
5. Daly, M. J. *et al.* PLINK: A Tool Set for Whole-Genome Association and Population-Based Linkage Analyses. *Am. J. Hum. Genet.* **81**, 559–575 (2007).
6. Li, G. *et al.* Extensive promoter-centered chromatin interactions provide a topological basis for transcription regulation. *Cell* **148**, 84–98 (2012).
7. Messeguer, X. *et al.* PROMO: detection of known transcription regulatory elements using species-tailored searches. *Bioinforma. Oxf. Engl.* **18**, 333–334 (2002).
8. Farré, D. *et al.* Identification of patterns in biological sequences at the ALGGEN server: PROMO and MALGEN. *Nucleic Acids Res.* **31**, 3651–3653 (2003).
9. Akiyama, Y. Tfsearch: Searching transcription factor binding sites. (1998).
10. Liu, L. *et al.* Regulation of Gγ-Globin Gene by ATF2 and Its Associated Proteins through the cAMP-Response Element. *PLoS ONE* **8**, (2013).
11. Chae, J. H. & Kim, C. G. CP2 binding to the promoter is essential for the enhanced transcription of globin genes in erythroid cells. *Mol. Cells* **15**, 40–47 (2003).
12. Zhao, Q., Cumming, H., Cerruti, L., Cunningham, J. M. & Jane, S. M. Site-specific acetylation of the fetal globin activator NF-E4 prevents its ubiquitination and regulates its interaction with the histone deacetylase, HDAC1. *J. Biol. Chem.* **279**, 41477–41486 (2004).
13. Sangerman, J. *et al.* Mechanism for fetal hemoglobin induction by histone deacetylase inhibitors involves gamma-globin activation by CREB1 and ATF-2. *Blood* **108**, 3590–3599 (2006).
14. Menzel, S., Garner, C., Rooks, H., Spector, T. D. & Thein, S. L. HbA2 levels in normal adults are influenced by two distinct genetic mechanisms. *Br. J. Haematol.* **160**, 101–105 (2013).

15. Stadhouders, R. *et al.* Dynamic long-range chromatin interactions control Myb proto-oncogene transcription during erythroid development. *EMBO J.* **31**, 986–999 (2012).
16. Stadhouders, R. *et al.* HBS1L-MYB intergenic variants modulate fetal hemoglobin via long-range MYB enhancers. *J. Clin. Invest.* **124**, 1699–1710 (2014).
17. Zeller, T. *et al.* Genetics and Beyond – The Transcriptome of Human Monocytes and Disease Susceptibility. *PLoS ONE* **5**, e10693 (2010).
18. Jiang, J. *et al.* cMYB is involved in the regulation of fetal hemoglobin production in adults. *Blood* **108**, 1077–1083 (2006).
19. R Core Team. *R: A language and environment for statistical computing.* (R Foundation for Statistical Computing, Vienna, Austria, 2013).
20. Pilia, G. *et al.* Heritability of cardiovascular and personality traits in 6,148 Sardinians. *PLoS Genet.* **2**, e132 (2006).
21. Rosatelli, M. C. *et al.* Molecular characterization of beta-thalassemia in the Sardinian population. *Am. J. Hum. Genet.* **50**, 422–426 (1992).
22. Howie, B., Fuchsberger, C., Stephens, M., Marchini, J. & Abecasis, G. R. Fast and accurate genotype imputation in genome-wide association studies through pre-phasing. *Nat. Genet.* **44**, 955–959 (2012).
23. Li, Y., Willer, C. J., Ding, J., Scheet, P. & Abecasis, G. R. MaCH: using sequence and genotype data to estimate haplotypes and unobserved genotypes. *Genet. Epidemiol.* **34**, 816–834 (2010).
24. Danjou, F. *et al.* Genetic modifiers of  $\beta$ -thalassemia and clinical severity as assessed by age at first transfusion. *Haematologica* **97**, 989–993 (2012).
25. Danjou, F. *et al.* A genetic score for the prediction of beta-thalassemia severity. *Haematologica* haematol.2014.113886 (2014). doi:10.3324/haematol.2014.113886
26. Tatusova, T., Ciufu, S., Fedorov, B., O'Neill, K. & Tolstoy, I. RefSeq microbial genomes database: new representation and annotation strategy. *Nucleic Acids Res.* **42**, D553–559 (2014).
27. Su, M. Y. *et al.* Identification of Biologically Relevant Enhancers in Human Erythroid Cells. *J. Biol. Chem.* **288**, 8433–8444 (2013).
28. Pruim, R. J. *et al.* LocusZoom: regional visualization of genome-wide association scan results. *Bioinformatics* **26**, 2336–7 (2010).
29. Kircher, M. *et al.* A general framework for estimating the relative pathogenicity of human genetic variants. *Nat. Genet.* **46**, 310–315 (2014).

30. Welter, D. *et al.* The NHGRI GWAS Catalog, a curated resource of SNP-trait associations. *Nucleic Acids Res.* **42**, D1001–D1006 (2014).
31. Raychaudhuri, S. *et al.* Identifying Relationships among Genomic Disease Regions: Predicting Genes at Pathogenic SNP Associations and Rare Deletions. *PLoS Genet* **5**, e1000534 (2009).
32. Ashburner, M. *et al.* Gene ontology: tool for the unification of biology. The Gene Ontology Consortium. *Nat. Genet.* **25**, 25–29 (2000).
33. Kapushesky, M. *et al.* Gene Expression Atlas at the European Bioinformatics Institute. *Nucleic Acids Res.* **38**, D690–D698 (2010).

## SUPPLEMENTARY FIGURES

### Supplementary Figure 1. Empirical evaluation of genomic power upon reference panel population.

The figure presents the power achieved for 1.3% of variance explained (equivalent to 80% power for 3,000 unrelated individuals and a MAF of 50%, at a p-value of  $5 \times 10^{-8}$ ), for five different ranges of allele frequencies. To calculate power we used the effective sample size as the product of sample size and average imputation quality (RSQR), so that the variation of power between populations is a direct consequence of the average RSQR for each range of allele frequencies.

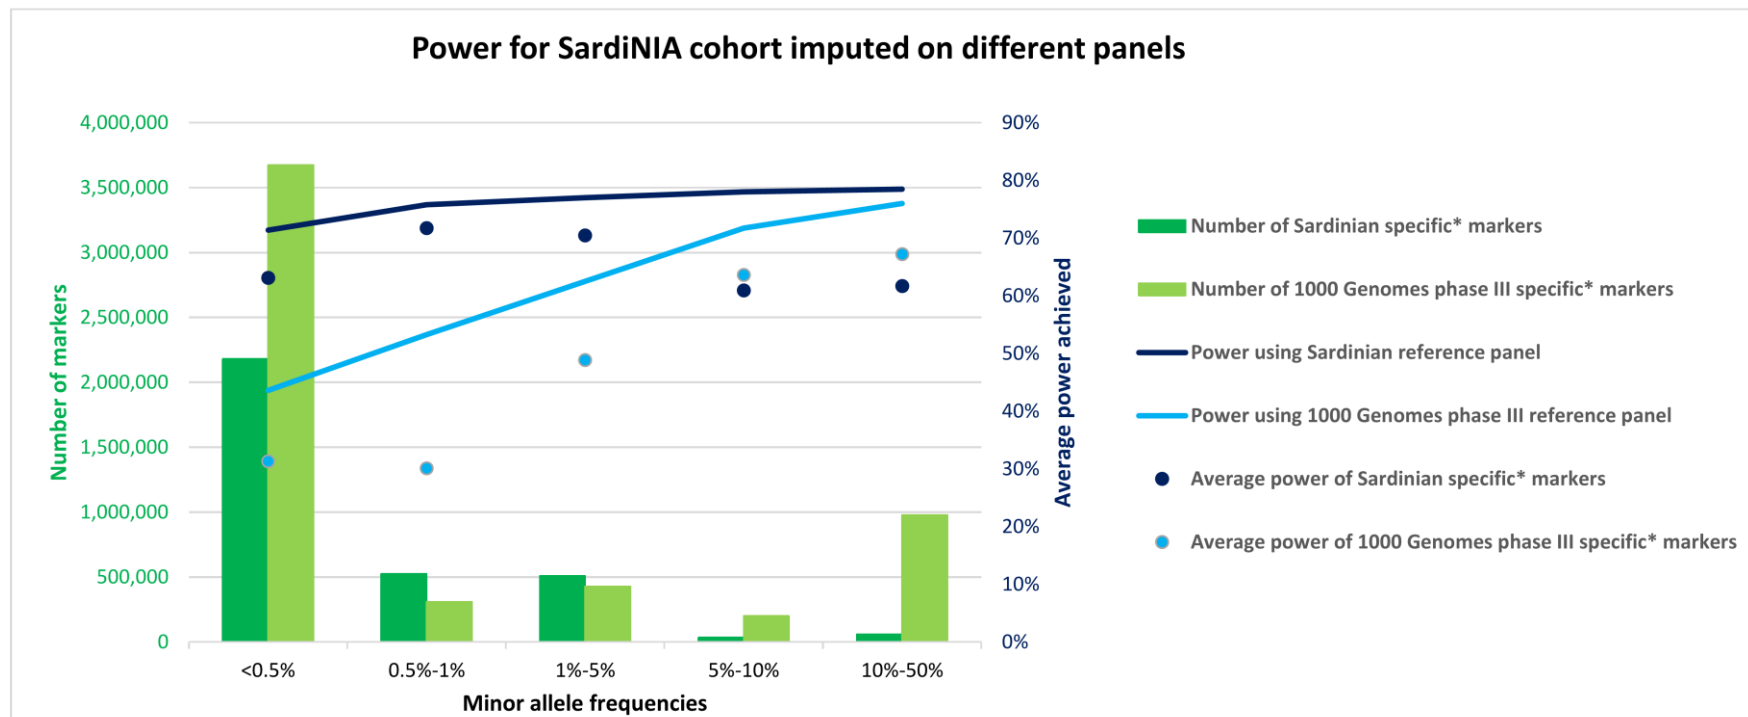

\* markers specific to one panel refer to variants that could be inferred according to imputation quality filters as defined in Pistis et al., 2014<sup>2</sup>.

### Supplementary Figure 2. Manhattan and QQ plots for the assessed hemoglobin types.

The figure shows association results for all the hemoglobin types at QCed genotyped and imputed autosomal markers, and only genotyped markers on the X chromosome. Results are those obtained from imputation using the Sardinian sequencing data. The inner box shows the quantile-quantile plot for theoretical versus observed p-values. The gray shadow represents 95% confidence interval.

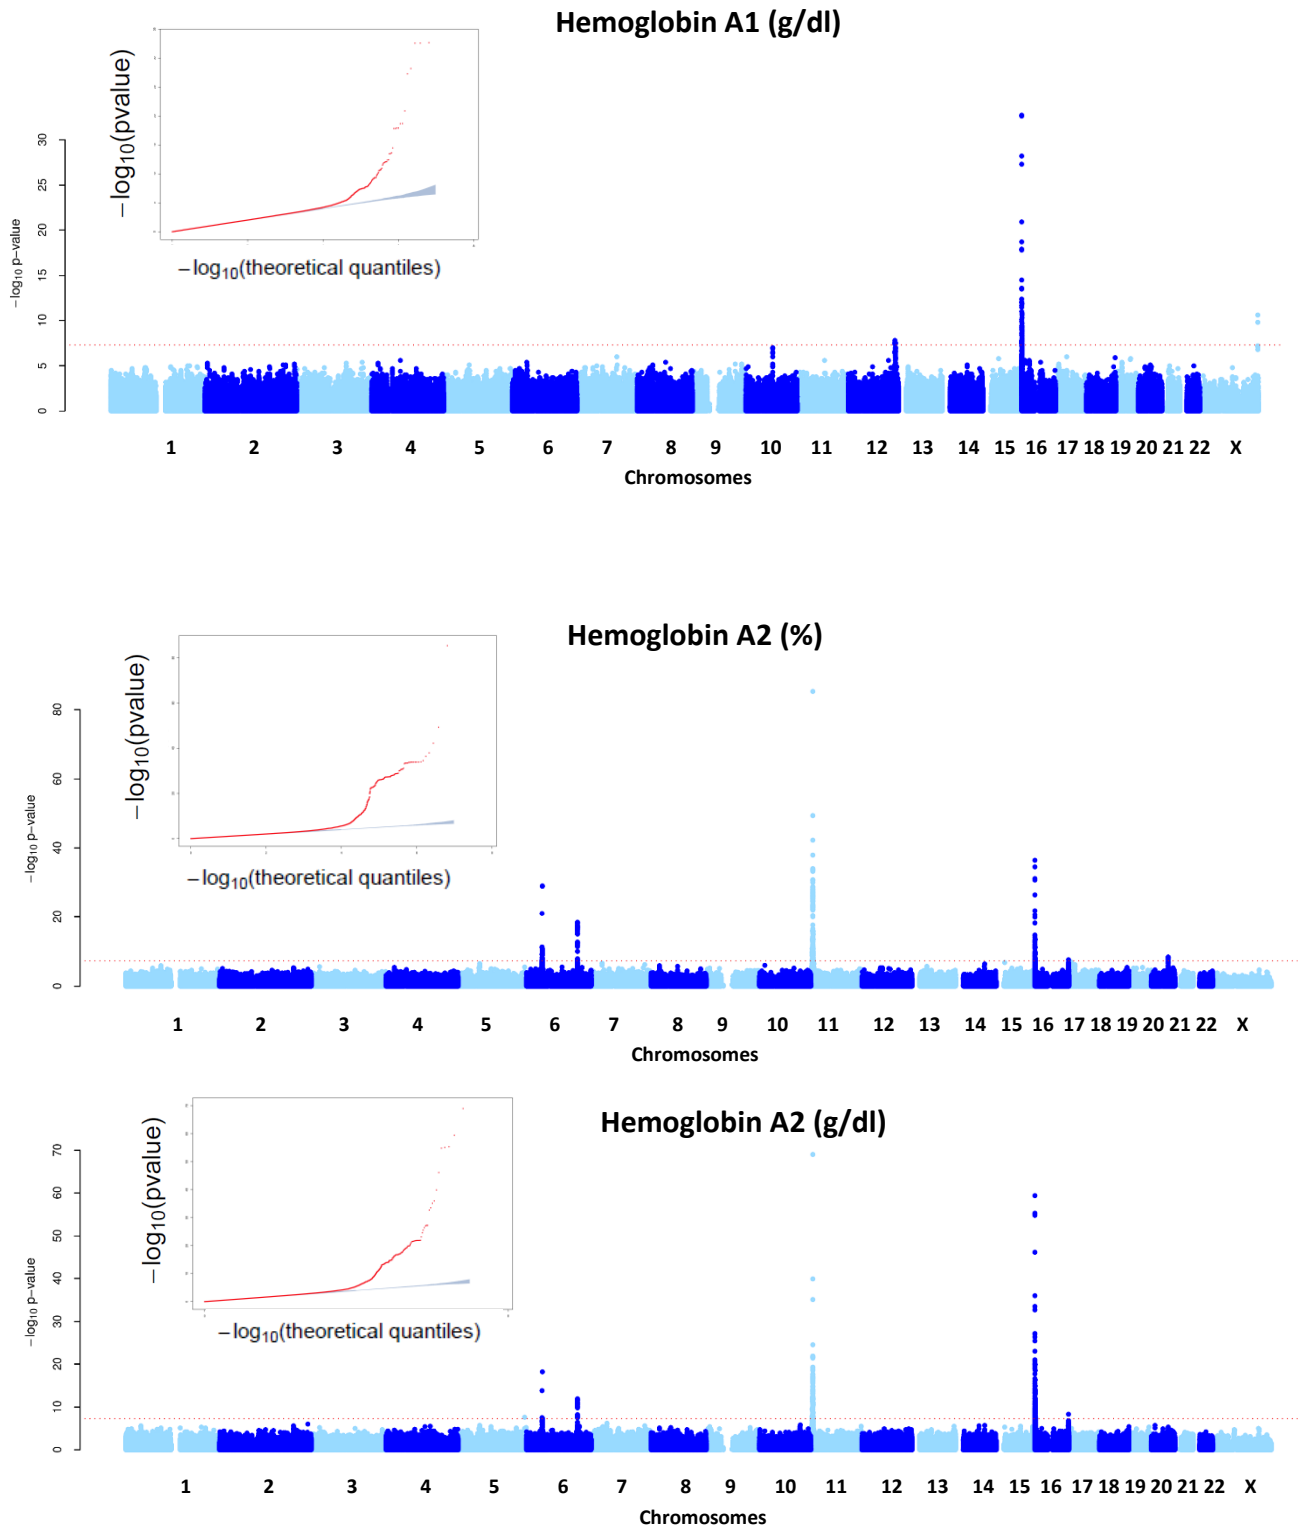

### Fetal hemoglobin (%)

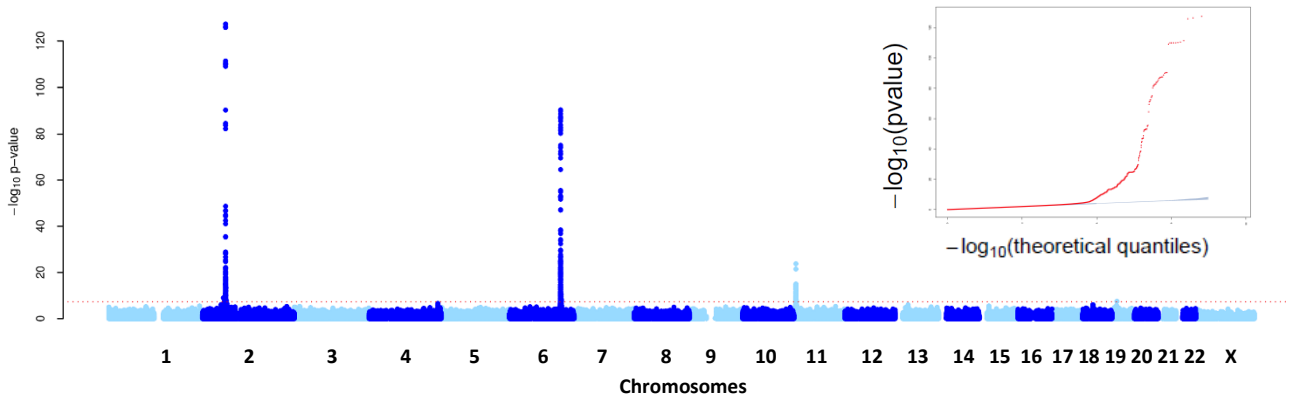

### Fetal hemoglobin (g/dl)

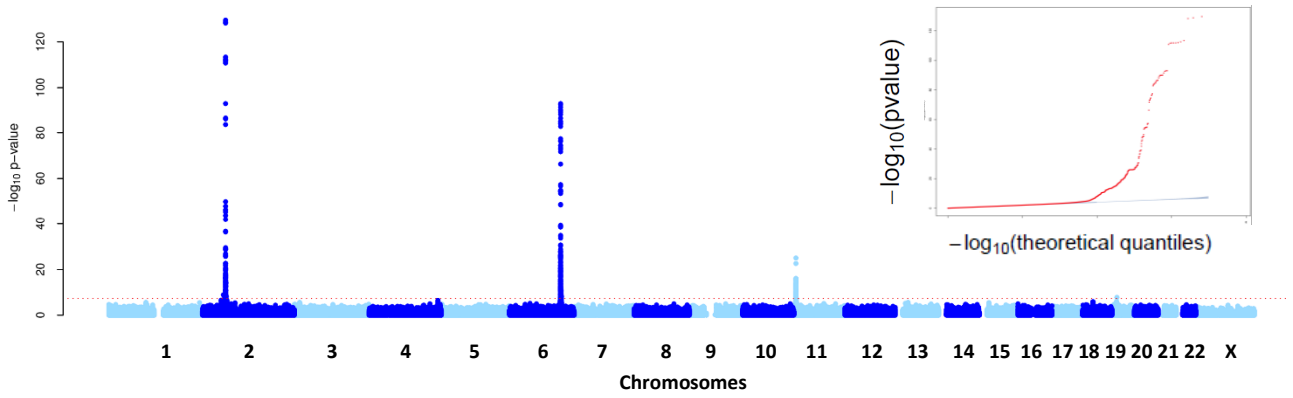

### Supplementary Figure 3. Regional plots of loci associated with HbA1.

Regional association plots at the loci associated with HbA1, for imputation performed using the Sardinian sequencing-based reference panel. At each locus, we plotted association strength (Y axis showing the  $-\log_{10}$  p-value) versus the genomic positions (on the hg19/GRCh37 genomic build) around the most significant SNP, which is indicated with a purple dot. Other SNPs in the region are color-coded to reflect their LD with the top SNP as in the inset (taken from pairwise  $r^2$  values calculated on Sardinians) or gray if LD was  $<0.01$ . Symbols reflect genomic functional annotation, as indicated in the inner box of the first figure. A blue line representing recombination rate in HapMap CEU populations overlies the plot. Symbols reflect genomic functional annotation, as indicated for Locus 1. A box at the bottom of each locus show location of genes and the position of exons, as well as the direction of transcription, according to RefSeq<sup>26</sup>. In the globin genes clusters two additional boxes report the classical DNase hypersensitive sites and putative specific human erythroid cells enhancers (according to Su et al., 2014)<sup>27</sup>, respectively. This plot was drawn using the standalone version of the LocusZoom package<sup>28</sup>.

#### Locus 1

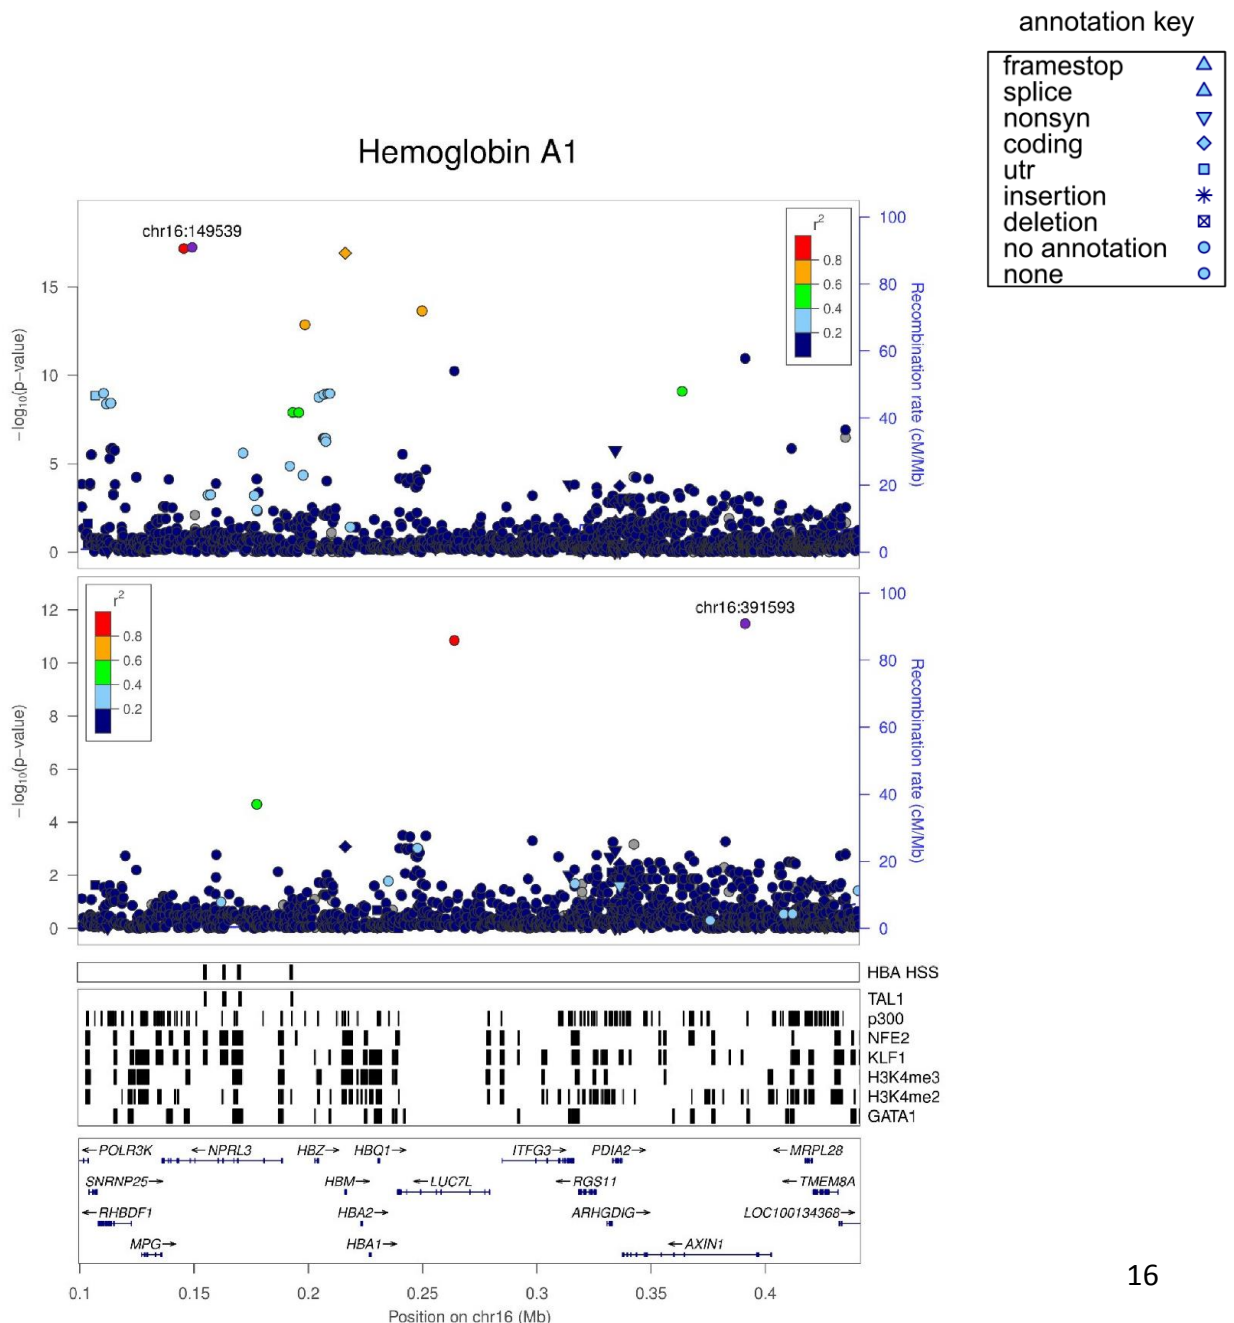



## Locus 2

### Hemoglobin A1

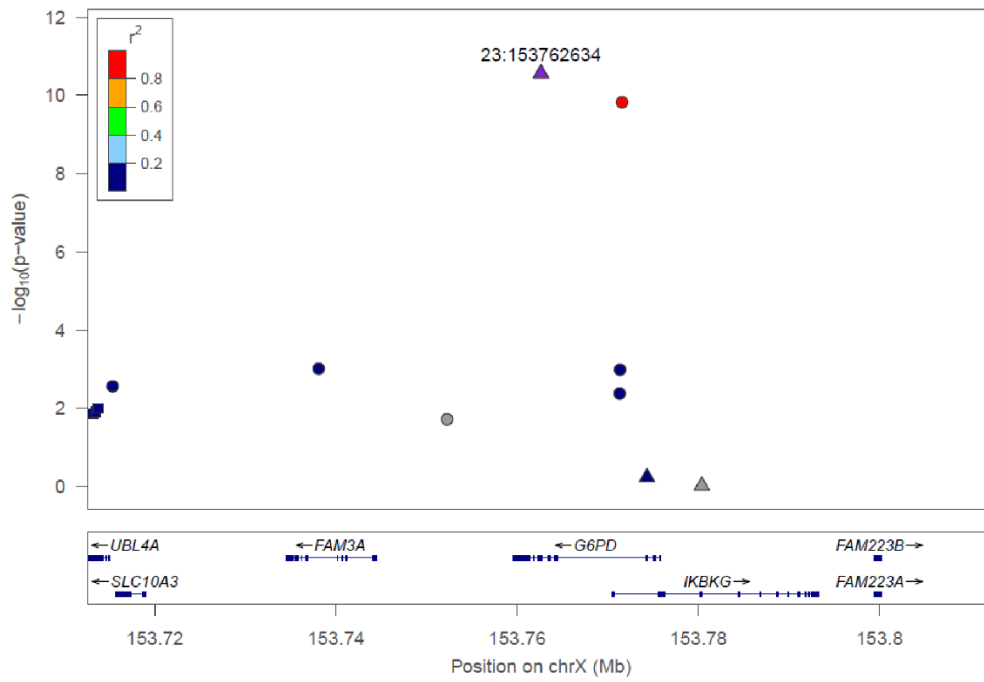

## Locus 3

### Hemoglobin A1

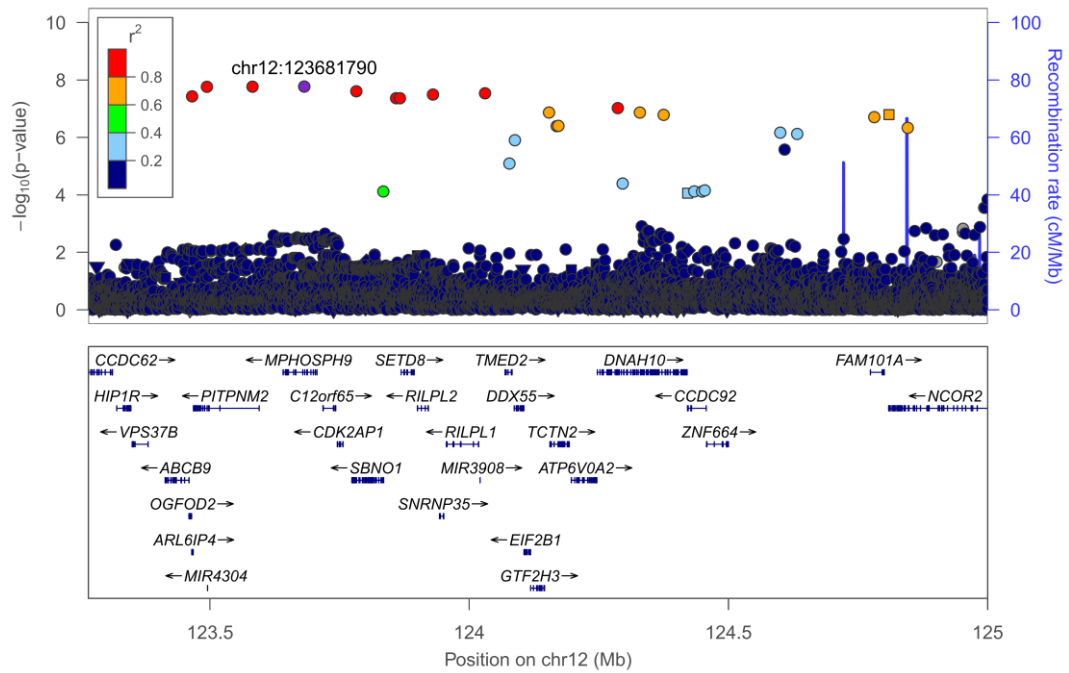

## Supplementary Figure 4. Regional plots of loci associated with HbA2.

Regional association plots at the loci associated with HbA2, for imputation performed using the Sardinian reference panel. For a description of the plot and specific features see **Supplementary Figure 3** legend.

### Locus 1

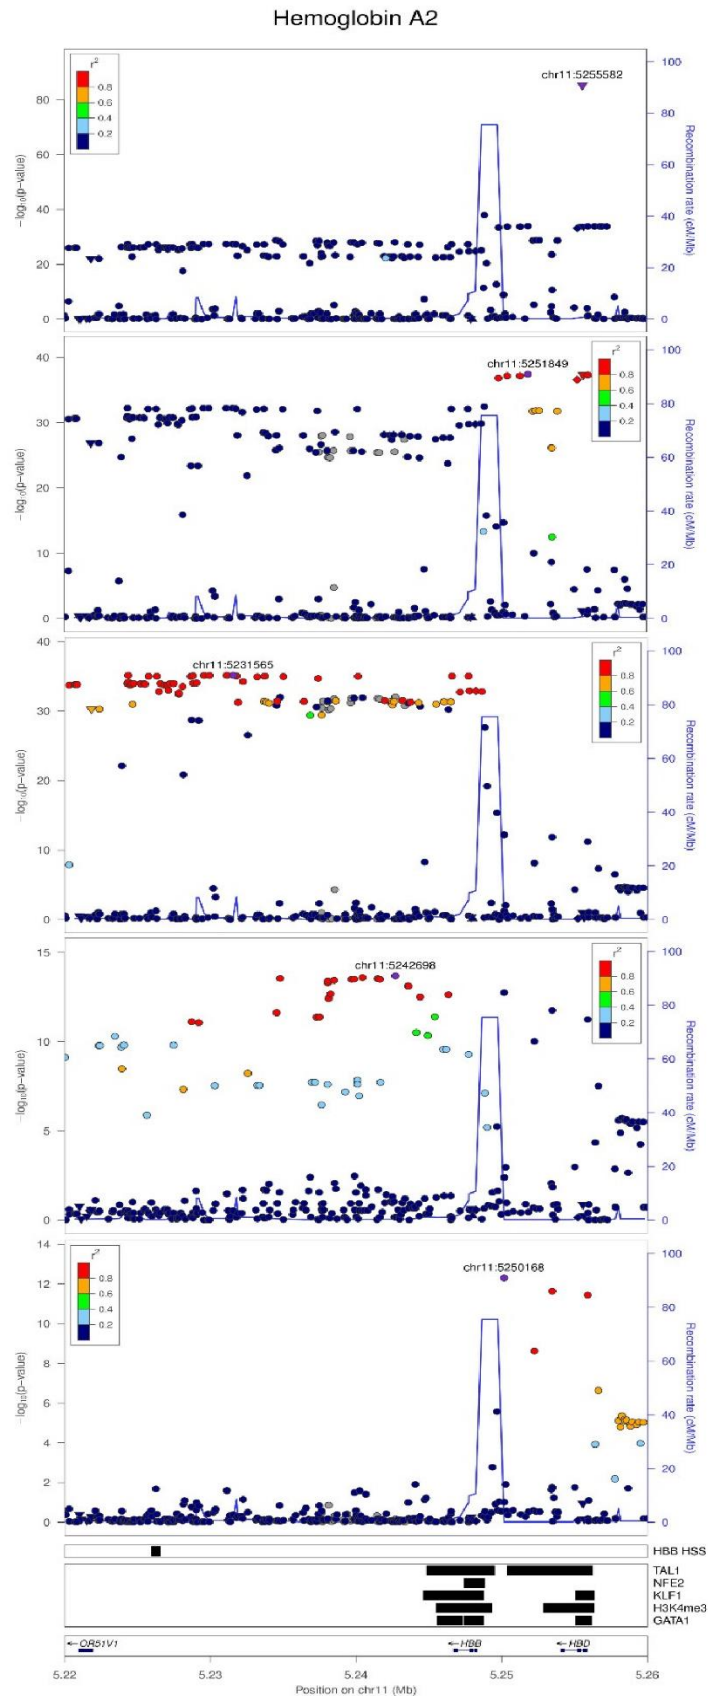

**Locus 2**

**Hemoglobin A2**

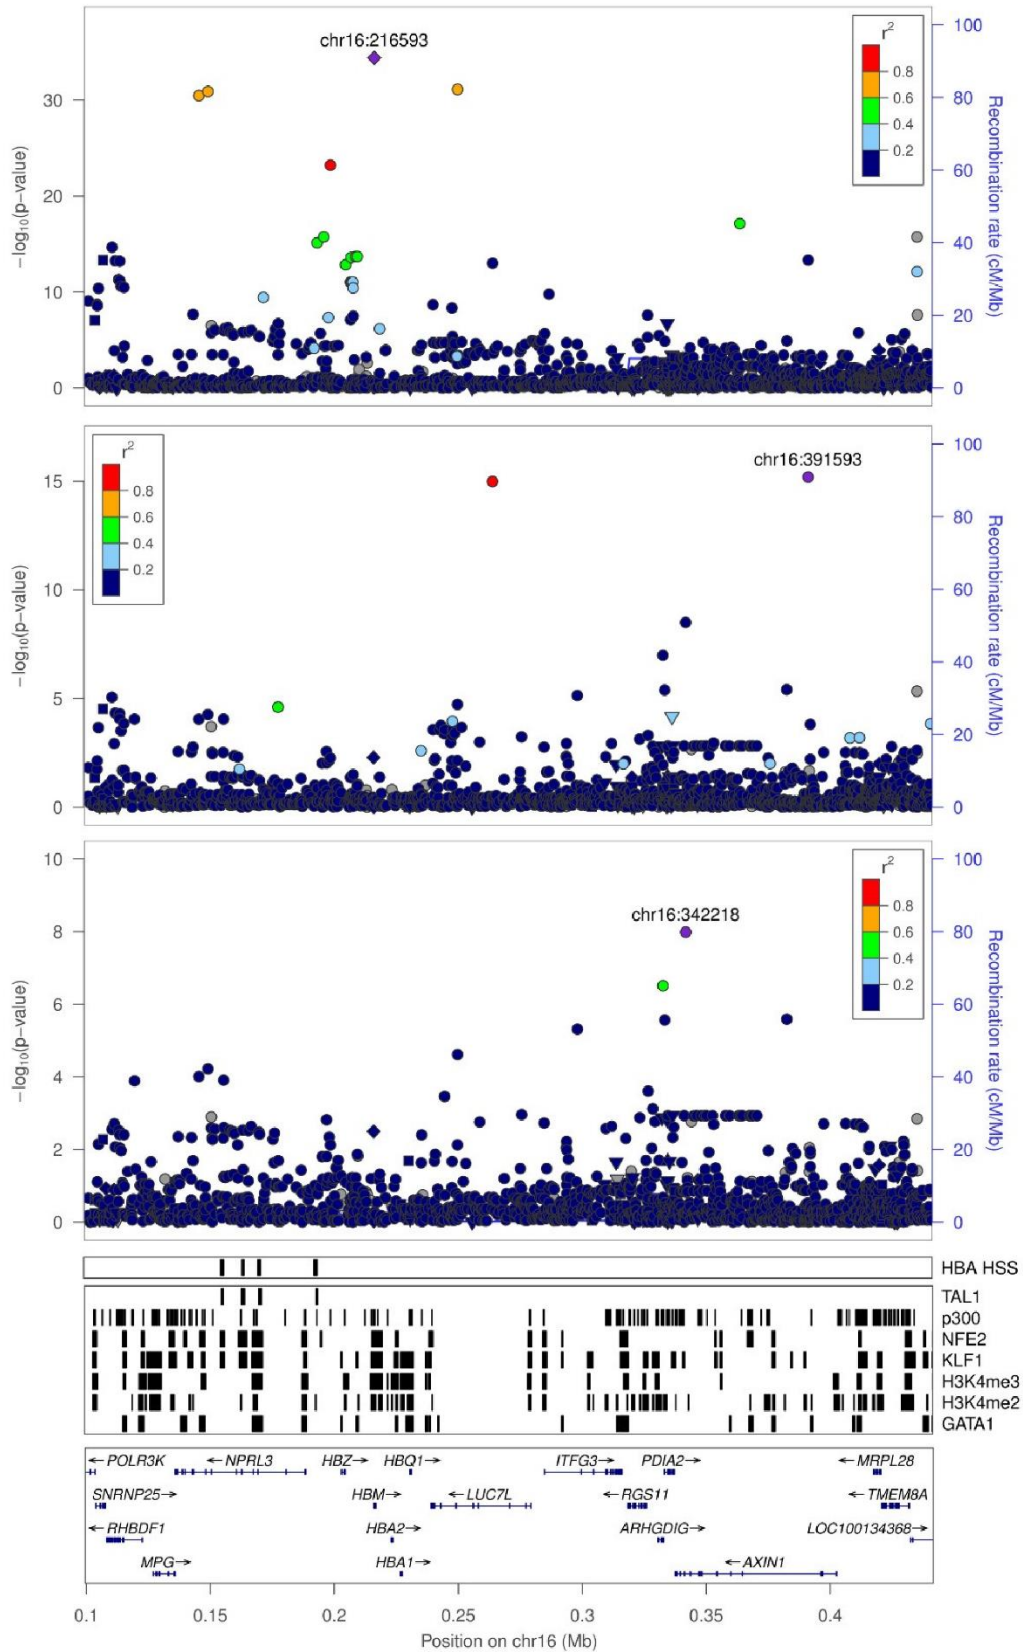

### Locus 3

#### Hemoglobin A2

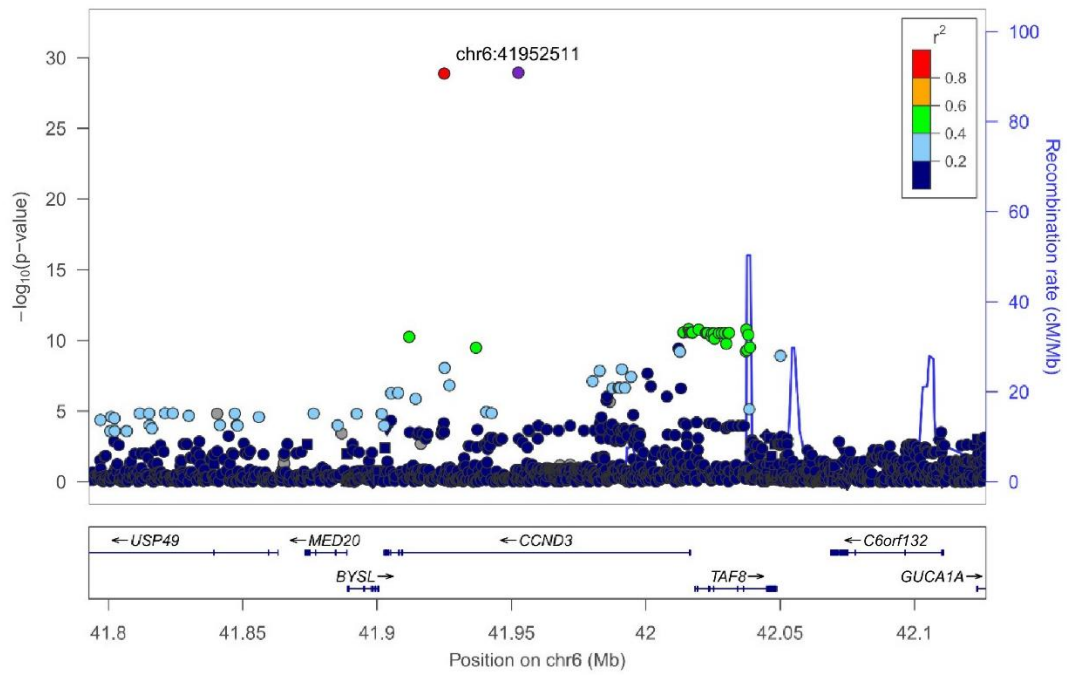

### Locus 4

#### Hemoglobin A2

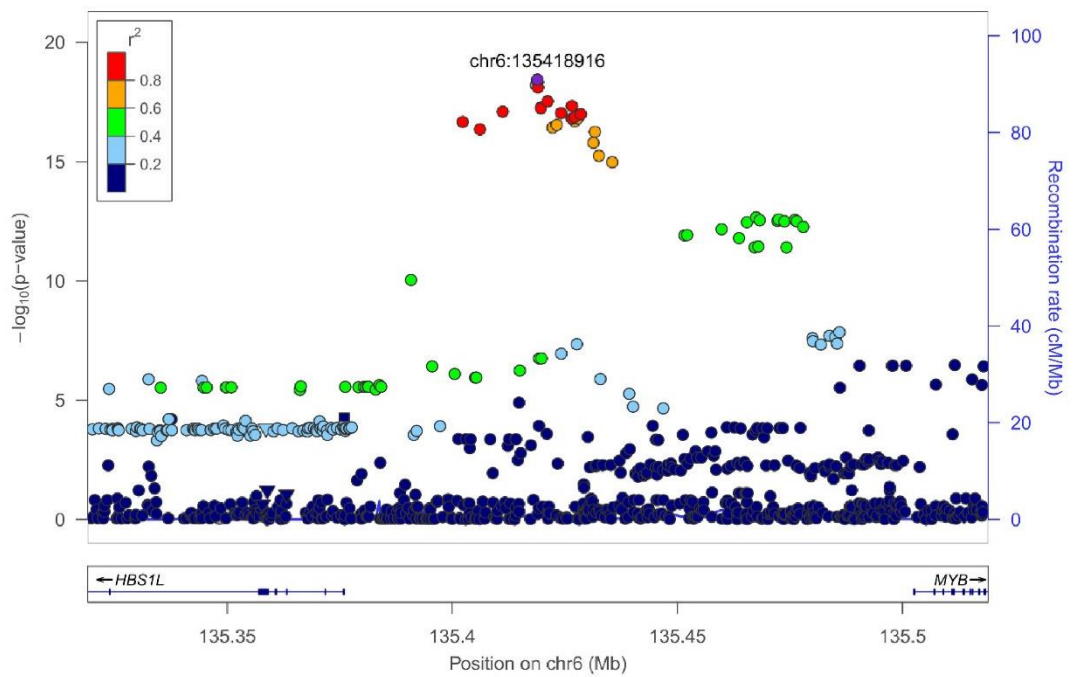

## Locus 5

### Hemoglobin A2

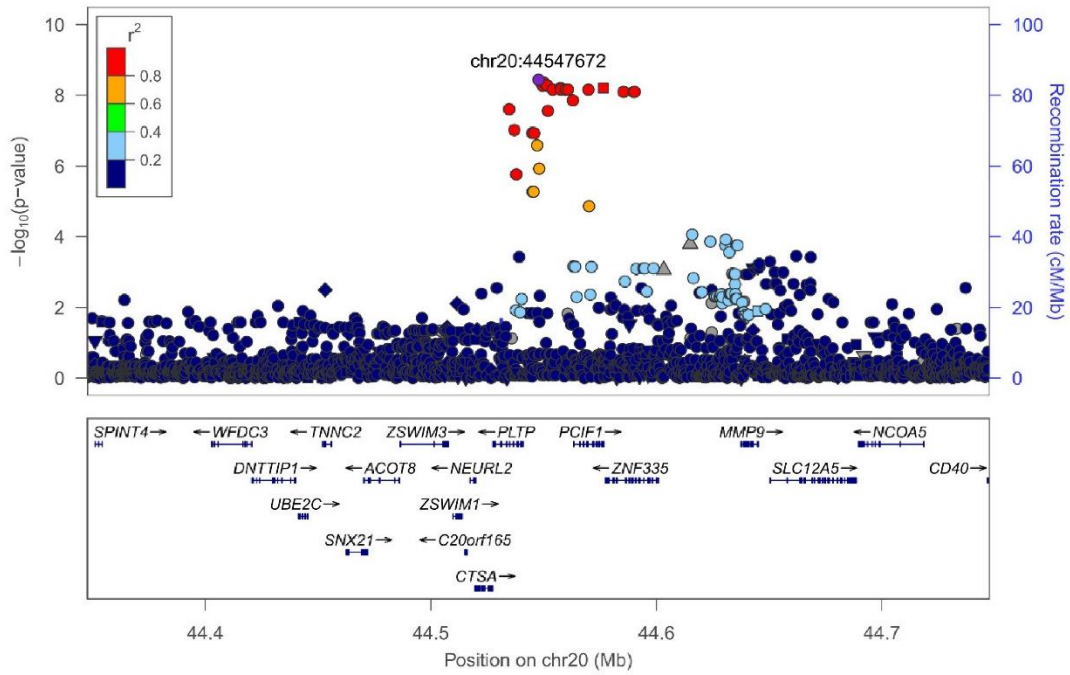

## Locus 6

### Hemoglobin A2

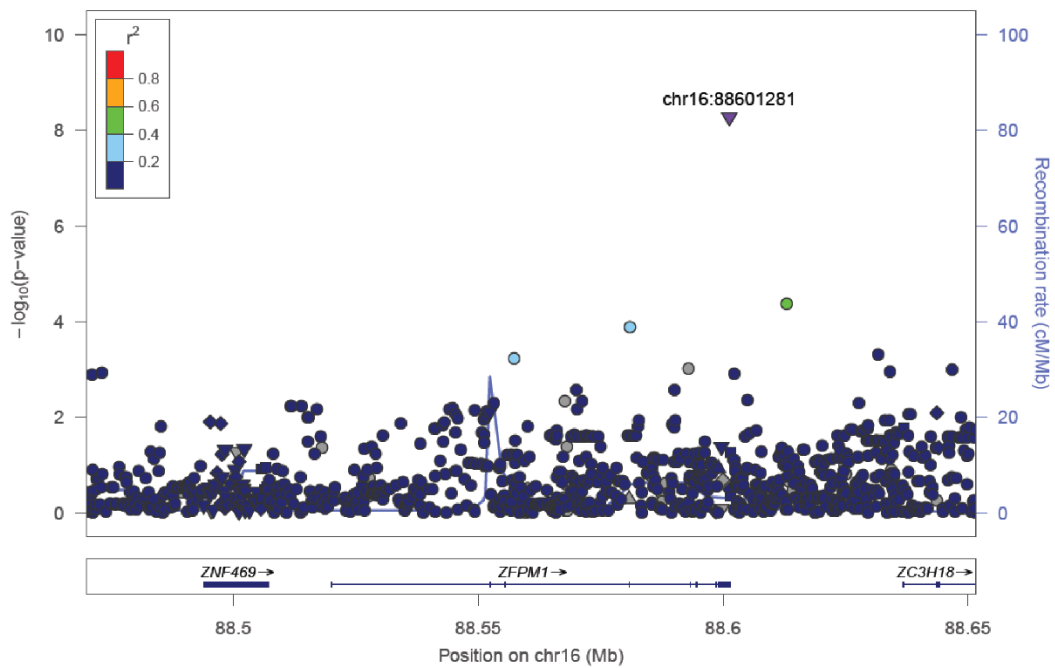

### Supplementary Figure 5. Regional plots of loci associated with HbF.

Regional association plots at the loci associated with HbF, for imputation performed using the Sardinian reference panel. For a description of the plot and specific features see **Supplementary Figure 3** legend.

#### Locus 1

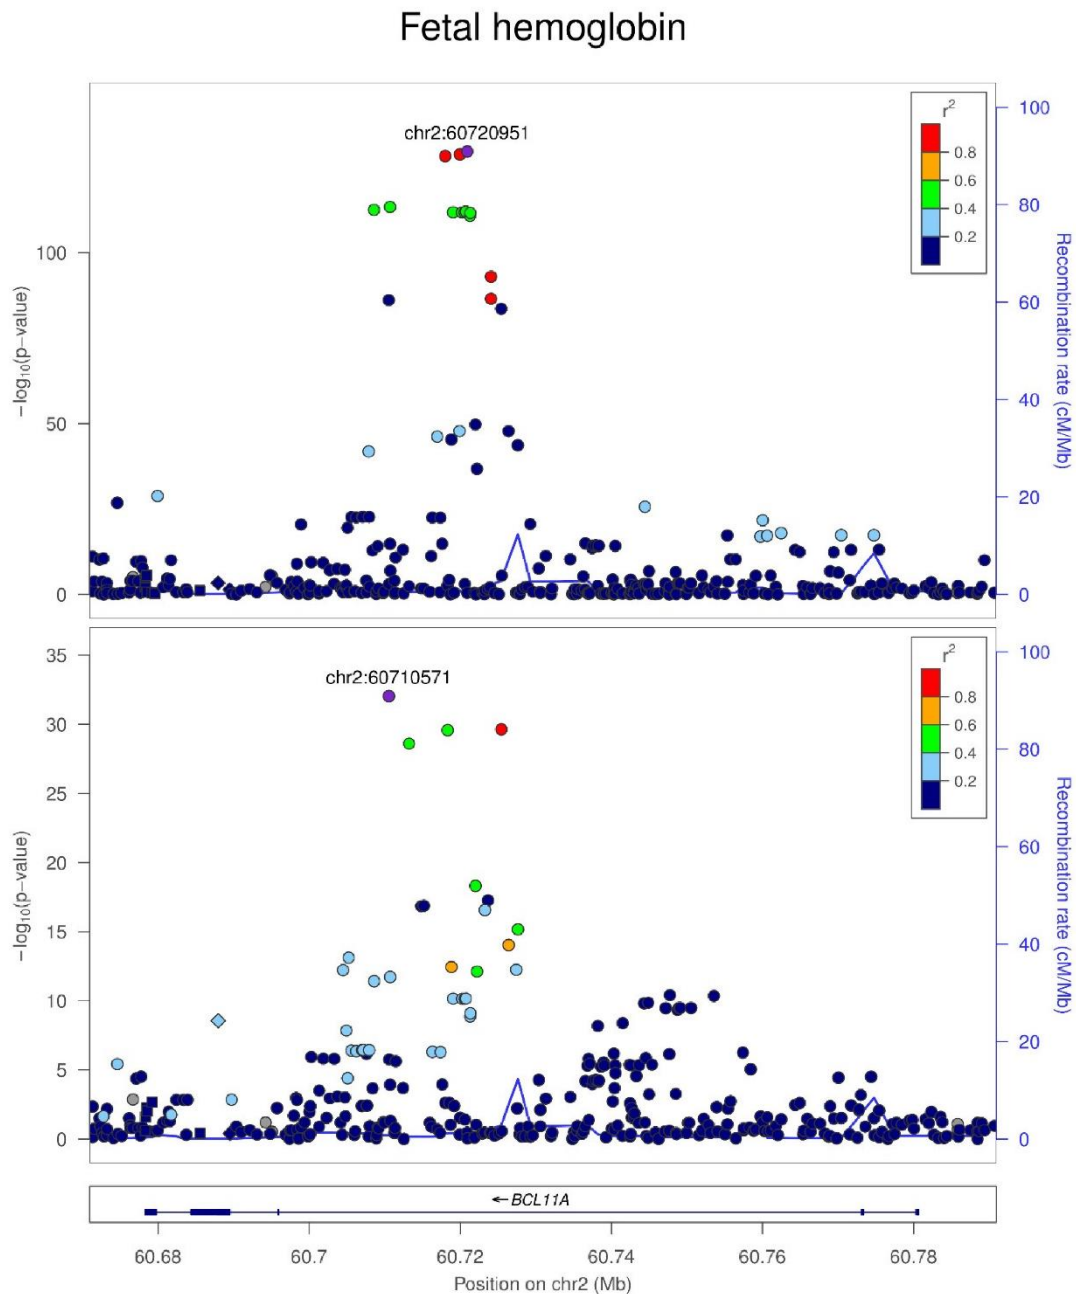

**Locus 2**

**Fetal hemoglobin**

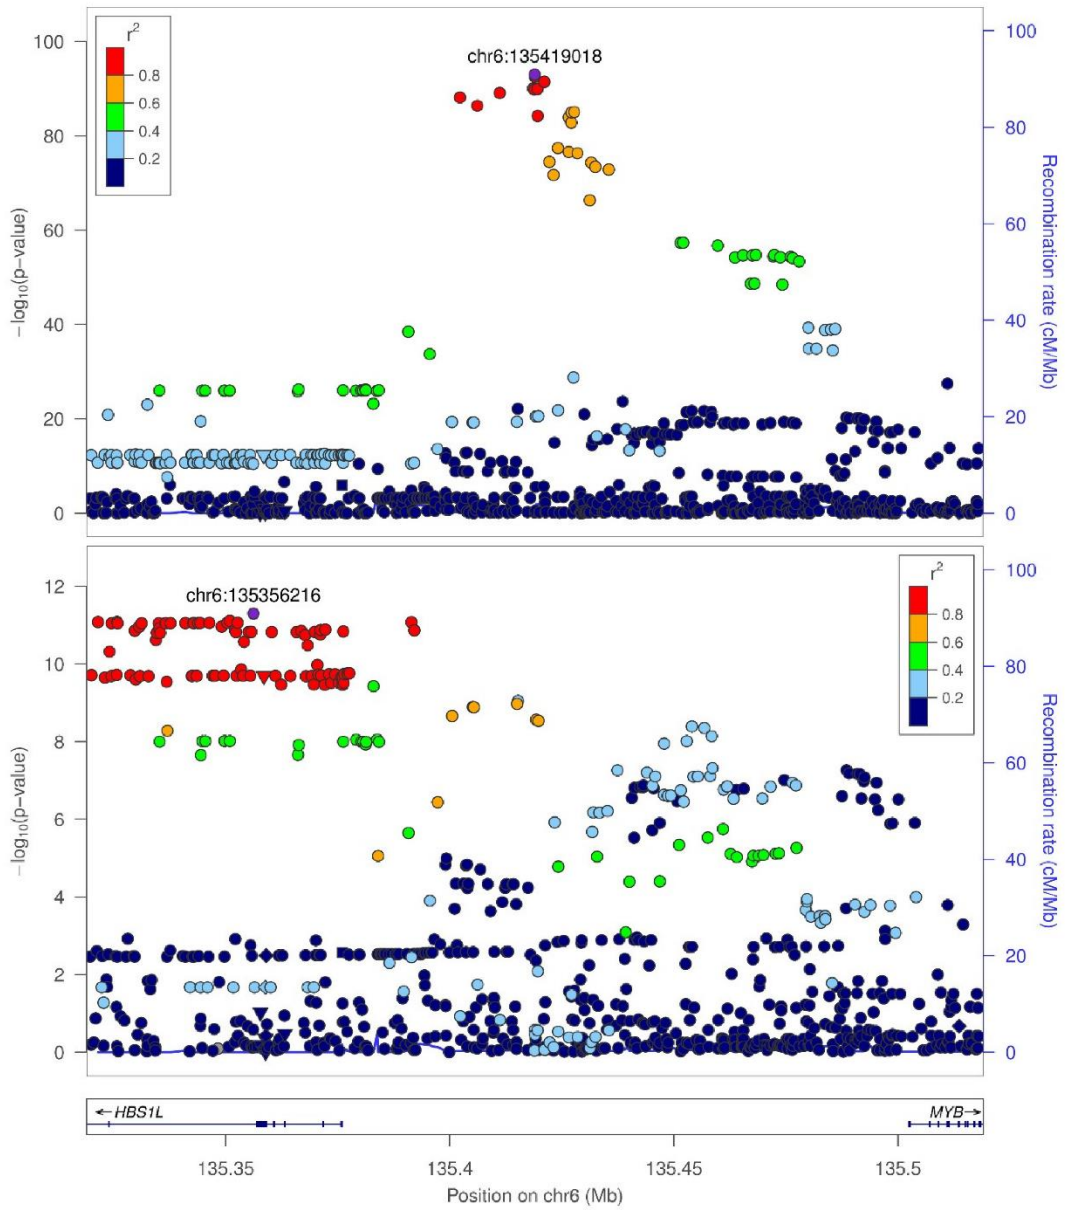

### Locus 3

### Fetal hemoglobin

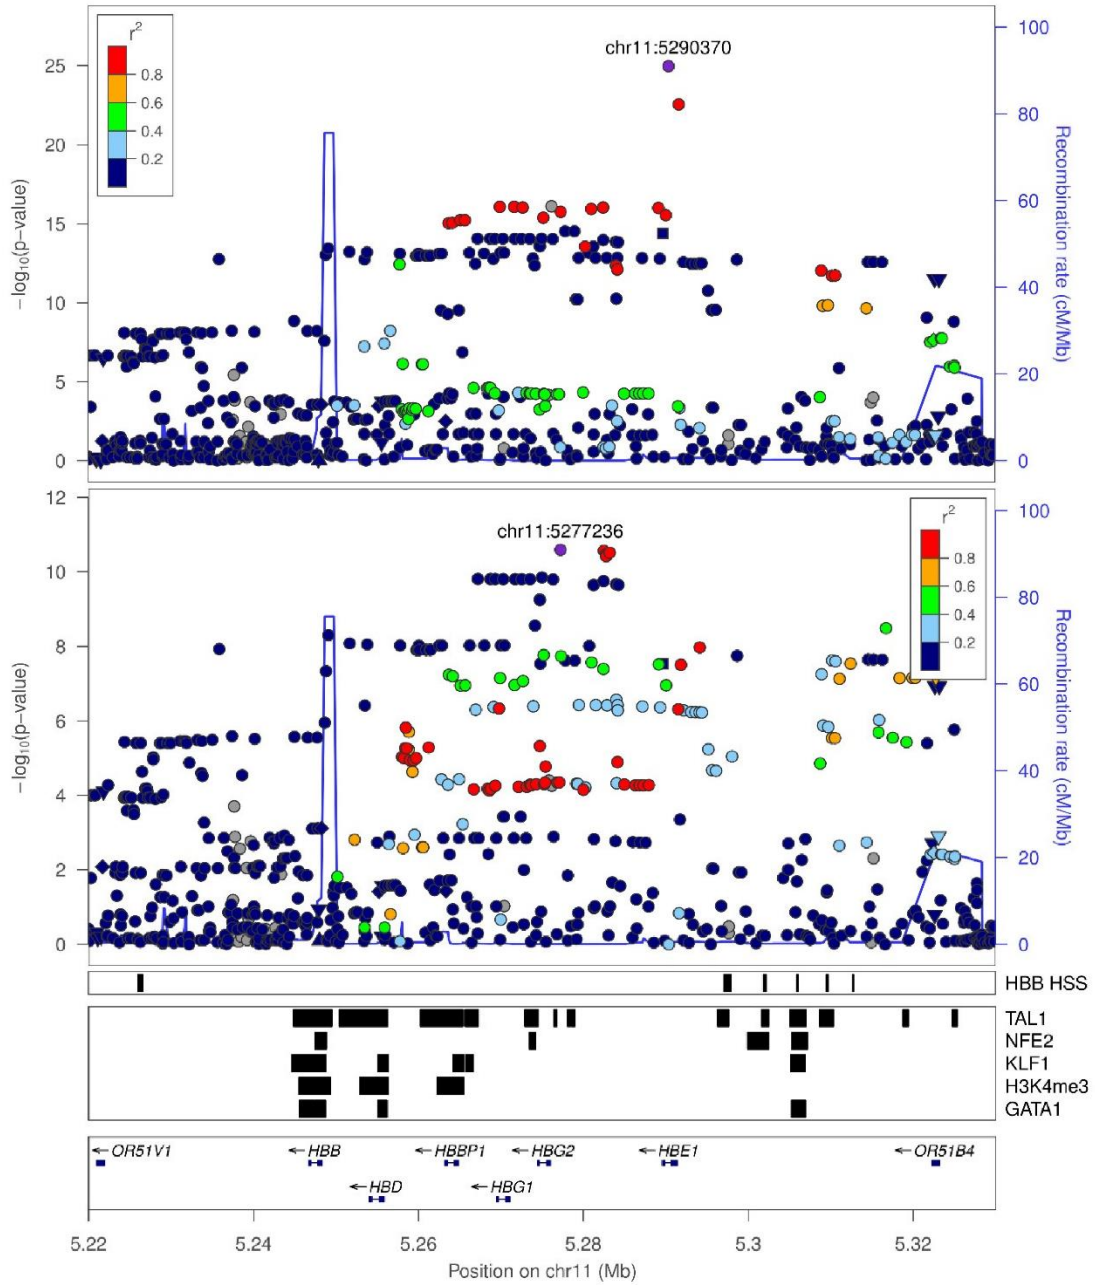



## Locus 4

### Fetal hemoglobin

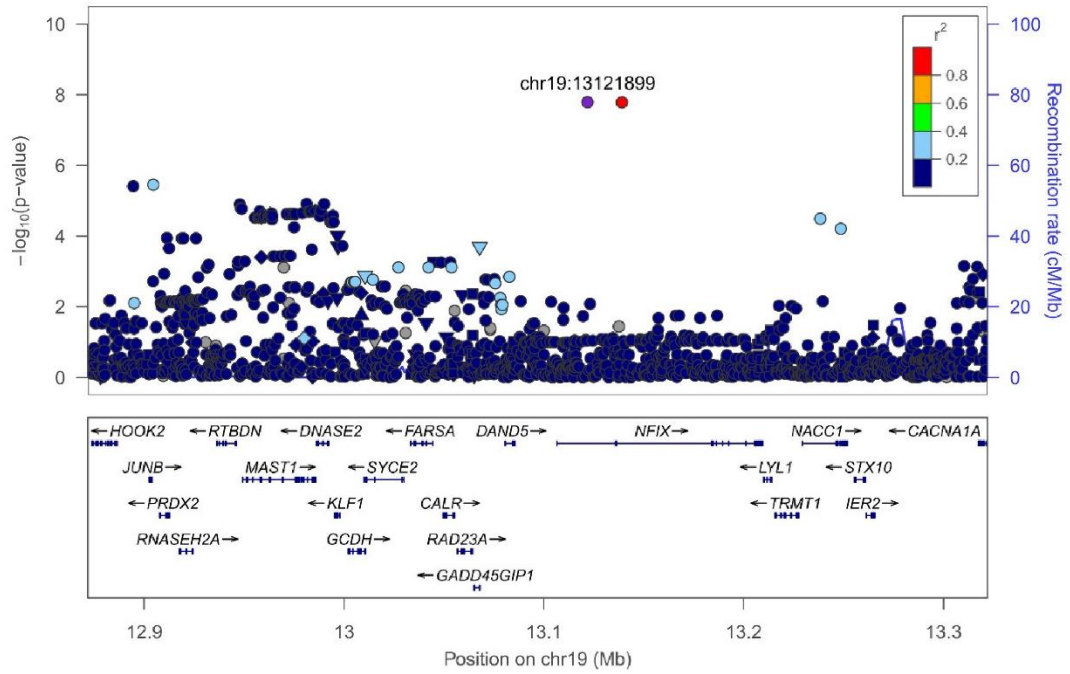

## SUPPLEMENTARY TABLES

### Supplementary Table 1. Characteristics of the studied cohort.

Basic descriptive statistics for the 6,305 individuals with genotyped data and full measurements for all three hemoglobin types, out of the 6,602 genotyped and imputed. Statistics are reported separately for carriers and non-carriers of the  $\beta^{039}$  mutation.

| All genotyped samples |             |                                                                |     |                                                                |  |
|-----------------------|-------------|----------------------------------------------------------------|-----|----------------------------------------------------------------|--|
| Males/ Females        | 2823 / 3779 |                                                                |     |                                                                |  |
| Age mean (sd)         | 43.6 (17.6) |                                                                |     |                                                                |  |
|                       |             | Non-carriers                                                   |     | Carriers                                                       |  |
|                       | N           | Median hemoglobin levels<br>(5th percentile - 95th percentile) | N   | Median hemoglobin levels<br>(5th percentile - 95th percentile) |  |
| Total Hb (g/dl)       | 5662        | 14.000 (11.900 - 16.200)                                       | 643 | 12.000 (10.300 - 14.000)                                       |  |
| HbA2 (%)              | 5662        | 2.700 (2.200 - 3.200)                                          | 643 | 5.800 (5.000 - 6.700)                                          |  |
| HbF (%)               | 5662        | 0.300 (0 - 0.900)                                              | 643 | 0.900 (0 - 2.400)                                              |  |
| HbA1 (g/dl)           | 5662        | 13.538 (11.519 - 15.746)                                       | 643 | 11.168 (9.557 - 13.057)                                        |  |
| HbA2 (g/dl)           | 5662        | 0.382 (0.277 - 0.483)                                          | 643 | 0.699 (0.556 - 0.871)                                          |  |
| HbF (g/dl)            | 5662        | 0.036 (0 - 0.126)                                              | 643 | 0.107 (0 - 0.275)                                              |  |

**Supplementary Table 2. Association results for the  $\beta^039$  and  $-\alpha$  3.7 deletion type I.**

The table shows the association results for the  $\beta^039$  mutation and  $-\alpha$  3.7 deletion type I, on all three hemoglobin forms. For each mutation, we indicated the chromosome and genomic position (hg19 build), the rs ID when available, the effect allele tested for association (EA) and the other allele at the SNP (OA), the SNP effect allele frequency (EAF) and the regression coefficients.

| Mutation                      | Alleles (EA/OA) | EAF   | Hemoglobin form | Effect (StdErr) | p-value                  |
|-------------------------------|-----------------|-------|-----------------|-----------------|--------------------------|
| $\beta^039$ ( rs11549407)     |                 |       |                 |                 |                          |
|                               | T/C             | 0.048 | HbA1 (g/dl)     | -1.5482 (0.029) | $<1.0 \times 10^{-300}$  |
|                               |                 |       | HbA2 (%)        | 1.9455 (0.034)  | $<1.0 \times 10^{-300}$  |
|                               |                 |       | HbF g/dl        | 1.1396 (0.036)  | $6.173 \times 10^{-206}$ |
| $-\alpha$ 3.7 deletion type I |                 |       |                 |                 |                          |
|                               | del/wild type   | 0.154 | HbA1 (g/dl)     | -0.2349 (0.026) | $4.578 \times 10^{-19}$  |
|                               |                 |       | HbA2 (%)        | -0.1877 (0.032) | $4.434 \times 10^{-09}$  |
|                               |                 |       | HbF (g/dl)      | -0.0710 (0.029) | $1.460 \times 10^{-02}$  |

**Supplementary Table 3. Joint-association analysis results for loci with multiple associated variants.**

The table presents the five loci at which different variants were associated at genome-wide significant levels, with effects and p-values corrected for all variants associated at the locus.

| Trait       | Loci                                           | variant      | p-value                | Effect (StdErr) |
|-------------|------------------------------------------------|--------------|------------------------|-----------------|
| <b>HbA1</b> | <b><math>\alpha</math>-globin gene cluster</b> | rs570013781  | $1.50 \times 10^{-18}$ | -0.2025 (0.023) |
|             |                                                | chr16:391593 | $3.28 \times 10^{-12}$ | -0.4028 (0.058) |
| <b>HbA2</b> | <b><math>\beta</math>-globin gene cluster</b>  | rs35152987   | $8.09 \times 10^{-97}$ | -2.2450 (0.106) |
|             |                                                | rs7944544    | $7.90 \times 10^{-42}$ | -1.3020 (0.095) |
|             |                                                | rs12793110   | $3.53 \times 10^{-18}$ | -0.1800 (0.021) |
|             |                                                | rs11036338   | $5.20 \times 10^{-14}$ | 0.1256 (0.017)  |
|             |                                                | rs7936823    | $5.00 \times 10^{-13}$ | 0.1117 (0.015)  |
|             | <b><math>\alpha</math>-globin gene cluster</b> | rs141494605  | $3.70 \times 10^{-43}$ | -0.3540 (0.026) |
|             |                                                | chr16:391593 | $1.38 \times 10^{-15}$ | -0.5035 (0.063) |
|             |                                                | rs148706947  | $1.04 \times 10^{-08}$ | 0.2892 (0.051)  |
| <b>HbF</b>  | <b><i>BCL11A</i></b>                           | rs4671393    | $3.00 \times 10^{-76}$ | 0.4644 (0.025)  |
|             |                                                | rs13019832   | $9.12 \times 10^{-33}$ | -0.2024 (0.017) |
|             | <b><i>HBS1L-MYB</i></b>                        | rs9399137    | $7.46 \times 10^{-94}$ | 0.5195 (0.025)  |
|             |                                                | rs11754265   | $5.04 \times 10^{-12}$ | -0.1421 (0.021) |
|             | <b><math>\beta</math>-globin gene cluster</b>  | rs67385638   | $4.67 \times 10^{-35}$ | 0.3103 (0.025)  |
|             |                                                | rs2855122    | $2.57 \times 10^{-11}$ | -0.1458 (0.022) |

**Supplementary Table 4. Validation of top genome-wide findings.**

For each SNP, we show the number of heterozygotes and homozygotes for the reference and alternative alleles that were imputed using the Sardinian panel, the method used for validation, the number of these that were genotyped or sequenced along with the genotype mismatch rate, the p-value observed in our primary analysis (as reported in **Table 1**) and the p-value obtained replacing imputed genotypes with those inferred from Sanger sequencing or Taqman assays.

| SNP                      | EAF    | N<br>hom.EA/het/hom.OA | Validation Method | Hom EA<br>(Mismatch %) | Het<br>(Mismatch %) | Hom OA<br>(Mismatch %) | Passed<br>Validation | Original<br>p-value    | Final p-value          |
|--------------------------|--------|------------------------|-------------------|------------------------|---------------------|------------------------|----------------------|------------------------|------------------------|
| chr12:123681790          | 0.0105 | 2/130/6173             | Sanger            | 2 (0%)                 | 64 (6.3%)           | 6 (0%)                 | Yes                  | 1.68x10 <sup>-08</sup> | 2.10x10 <sup>-08</sup> |
| rs112233623 <sup>1</sup> | 0.1007 | 63/1158/5084           | TaqMan            | 8 (0%)                 | 244 (3.3%)          | 1132 (0.8%)            | Yes                  | 1.11x10 <sup>-29</sup> | 3.28x10 <sup>-30</sup> |
| rs183437571              | 0.0101 | 0/124/6181             | Sanger            | 0 (na)                 | 21 (0%)             | 17 (0%)                | Yes                  | 1.61x10 <sup>-08</sup> | 1.79x10 <sup>-08</sup> |
| rs7936823                | 0.4660 | 1339/3187/1779         | TaqMan            | 300 (1.7%)             | 704 (2.1%)          | 365 (1.6%)             | Yes                  | 5.00x10 <sup>-13</sup> | 1.08x10 <sup>-12</sup> |
| rs17525396 <sup>2</sup>  | 0.1360 | 141/1434/4730          | Affymetrix 6.0    | 40 (2.5%)              | 526 (2.3%)          | 1784 (0.3%)            | Yes                  | 6.79x10 <sup>-18</sup> | 6.65x10 <sup>-18</sup> |

<sup>1</sup> tag for rs113267280 –  $r^2 = 0.986$

<sup>2</sup> tag for rs570013781 –  $r^2 = 0.997$

**Supplementary Table 5. Functional annotation of signals reported in Table 1.**

The table shows the Combined Annotation Dependent Depletion (CADD) score<sup>29</sup> for each lead SNP and indicates the marker with the highest CADD among those in  $r^2 > 0.9$  with the lead, when available (using Sardinian linkage disequilibrium information), together with its functional annotation. The CADD score (in Phred scale) reported in the table, is a measure that integrates diverse genome annotations (including function features from the ENCODE Project, conservation metrics such as GERP and phastCons); it can help to quantitatively prioritize variants across a wide range of functional categories (the higher the score the more likely the functional relevance).

|                    | Lead SNP<br>(chr:position) | rsID from dbsnp142 | CADD score | SNP with highest CADD score and $r^2 > 0.9$ with lead |       |                 |                                                     |
|--------------------|----------------------------|--------------------|------------|-------------------------------------------------------|-------|-----------------|-----------------------------------------------------|
|                    |                            |                    |            | SNP                                                   | score | $r^2$ with lead | annotation                                          |
| <b>HbA1 (g/dl)</b> |                            |                    |            |                                                       |       |                 |                                                     |
| locus1             | 16:149539                  | rs570013781        | 1.12       | rs17525396                                            | 5.29  | 1               | intronic <i>NPRL3</i>                               |
|                    | 16:391593 (cond.)          | -                  | 2.99       | -                                                     | -     | -               | -                                                   |
| locus2             | X:153762634                | rs5030868          | 18.52      | -                                                     | -     | -               | -                                                   |
| locus3             | 12:123681790               | -                  | 0.153      | 12:123465483                                          | 12.05 | 1               | intronic <i>ARL6IP4</i> ; TFBS peak <sup>1</sup>    |
| <b>HbA2</b>        |                            |                    |            |                                                       |       |                 |                                                     |
| locus1 (%)         | 11:5255582                 | rs35152987         | 20.70      | -                                                     | -     | -               | -                                                   |
|                    | 11:5251849 (cond.)         | rs7944544          | 1.57       | rs35406175                                            | 18.82 | 0.94            | missense <i>HBD</i>                                 |
|                    | 11:5231565 (cond.)         | rs12793110         | 1.80       | rs35156960                                            | 12.51 | 0.94            | intronic AC104389.16                                |
|                    | 11:5242698 (cond.)         | rs11036338         | 0.83       | rs12362241                                            | 11.04 | 0.97            | -                                                   |
|                    | 11:5250168 (cond.)         | rs7936823          | 1.17       | rs3813727                                             | 4.83  | 0.93            | TFBS peak <sup>1</sup>                              |
| locus2 (g/dl)      | 16:216593                  | rs141494605        | 6.47       | -                                                     | -     | -               | -                                                   |
|                    | 16:391593 (cond.)          | -                  | 2.99       | -                                                     | -     | -               | -                                                   |
|                    | 16:342218 (cond.)          | rs148706947        | 3.33       | -                                                     | -     | -               | -                                                   |
| locus3 (%)         | 6:41952511                 | rs113267280        | 2.99       | rs112233623                                           | 6.34  | 0.99            | TFBS peak <sup>1</sup>                              |
| locus4 (%)         | 6:135418916                | rs7776054          | 12.71      | rs9399137                                             | 16.95 | 0.97            | -                                                   |
| locus5 (%)         | 20:44547672                | rs59329875         | 0.19       | rs1057208                                             | 12.85 | 0.97            | upstream <i>PCIF1</i> ; TFBS peak <sup>1</sup>      |
| locus6 (%)         | 16:88601281                | rs141006889        | 5.19       | -                                                     | -     | -               | -                                                   |
| <b>HbF (g/dl)</b>  |                            |                    |            |                                                       |       |                 |                                                     |
| locus1             | 2:60720951                 | rs4671393          | 0.74       | rs1427407                                             | 22.4  | 0.95            | upstream <i>AC009970.1</i> ; TFBS peak <sup>1</sup> |
|                    | 2:60710571 (cond.)         | rs13019832         | 7.26       | -                                                     | -     | -               | -                                                   |
| locus2             | 6:135419018                | rs9399137          | 16.95      | -                                                     | -     | -               | -                                                   |
|                    | 6:135356216 (cond.)        | rs11754265         | 4.51       | rs1041480                                             | 15.42 | 0.98            | intronic <i>HBS1L</i> ; TFBS peak <sup>1</sup>      |
| locus3             | 11:5290370                 | rs67385638         | 2.15       | rs2855036                                             | 9.42  | 0.91            | -                                                   |
|                    | 11:5277236 (cond.)         | rs2855122          | 2.35       | rs4910546                                             | 11.61 | 0.91            | -                                                   |
| locus4             | 19:13121899                | rs183437571        | 12.90      | -                                                     | -     | -               | -                                                   |

<sup>1</sup> = transcription factor binding site (TFBS) peak is present in annotation when CADD score reported such evidence.

**Supplementary Table 6. Association results at SNPs previously associated with hemoglobin or red blood cell indices.**

The table describes association results for the five assessed hemoglobin measurements at SNPs previously associated with hemoglobin or red blood cell indices, and included in GWAS Catalog<sup>30</sup>. The GWAS Catalog query was performed in date 01/25/2015 for the following traits: Erythrocytes sedimentation rate, F-cells distribution, Fetal HB levels, HbA2 levels, Hematocrit, Hematological and biochemical parameters, Hematology traits, Hemoglobin, Hemoglobin levels, Mean corpuscular hemoglobin, Mean corpuscular hemoglobin concentration, Mean corpuscular volume, Other erythrocyte phenotypes (RBC/MCHC), Red blood cell counts, Red blood cell traits. For each SNP, we report the position in genomic build 37, the p-value for each of the five hemoglobin measurements, the PubMed ID of the corresponding article, as well as the category, the original p-value and the notes as listed in the GWAS Catalog.

| dbSNP ID   | chr:position | Traits          |                 |                 |                  |                  | SNPs reported in GWAS Catalog |                                |                       |               |
|------------|--------------|-----------------|-----------------|-----------------|------------------|------------------|-------------------------------|--------------------------------|-----------------------|---------------|
|            |              | HBA1(g/dl)      | HBA2(%)         | HBA2(gdl)       | HBF(%)           | HBF(gdl)         | PUBMEDID                      | Disease/Trait                  | p-value               | p-value notes |
| rs1043879  | 1:25570081   | 9.43E-01        | 8.04E-02        | 1.42E-01        | 2.66E-01         | 3.10E-01         | 21700265                      | Erythrocyte sedimentation rate | 2.0x10 <sup>-09</sup> |               |
| rs10903129 | 1:25768937   | 7.88E-01        | 3.28E-01        | 3.35E-01        | 2.96E-01         | 3.32E-01         | 21700265                      | Erythrocyte sedimentation rate | 5.0x10 <sup>-13</sup> |               |
| rs12034383 | 1:207803595  | 7.99E-01        | 4.70E-01        | 6.62E-01        | 8.45E-01         | 7.19E-01         | 21700265                      | Erythrocyte sedimentation rate | 2.0x10 <sup>-28</sup> |               |
| rs3091242  | 1:25674785   | 7.20E-01        | 2.99E-01        | 3.14E-01        | 2.86E-01         | 2.99E-01         | 21700265                      | Erythrocyte sedimentation rate | 2.0x10 <sup>-13</sup> |               |
| rs7527798  | 1:207872290  | 8.55E-01        | 6.74E-01        | 7.94E-01        | 8.85E-01         | 9.90E-01         | 21700265                      | Erythrocyte sedimentation rate | 2.0x10 <sup>-09</sup> |               |
| rs10017284 | 4:121513215  | 6.35E-01        | 1.11E-01        | 9.92E-02        | 6.45E-01         | 5.53E-01         | 21326311                      | F-cell distribution            | 6.0x10 <sup>-06</sup> |               |
| rs11968814 | 6:71776971   | NA              | NA              | NA              | NA               | NA               | 21326311                      | F-cell distribution            | 9.0x10 <sup>-07</sup> |               |
| rs12073837 | 1:221010205  | 1.49E-01        | 3.08E-01        | 9.26E-02        | 9.02E-02         | 9.27E-02         | 21326311                      | F-cell distribution            | 2.0x10 <sup>-06</sup> |               |
| rs12559632 | X:22160992   | 2.56E-01        | 2.37E-01        | 2.17E-01        | 4.79E-01         | 5.38E-01         | 21326311                      | F-cell distribution            | 3.0x10 <sup>-06</sup> |               |
| rs1318772  | 5:112723567  | 1.55E-01        | 3.15E-01        | 1.80E-01        | 9.73E-01         | 9.86E-01         | 21326311                      | F-cell distribution            | 1.0x10 <sup>-06</sup> |               |
| rs1427407  | 2:60718043   | 3.80E-01        | 7.20E-01        | 9.96E-01        | <b>1.43E-126</b> | <b>5.60E-129</b> | 17767159                      | F-cell distribution            | 6.0x10 <sup>-31</sup> |               |
| rs17135859 | 5:112996654  | 4.68E-01        | 1.83E-01        | 6.47E-01        | 4.43E-01         | 3.54E-01         | 21326311                      | F-cell distribution            | 8.0x10 <sup>-06</sup> |               |
| rs1845344  | 4:120962385  | 4.93E-01        | 5.38E-01        | 6.69E-01        | 5.57E-01         | 6.06E-01         | 21326311                      | F-cell distribution            | 7.0x10 <sup>-06</sup> |               |
| rs2577720  | 2:23548614   | 4.63E-01        | 4.20E-01        | 3.31E-01        | 8.23E-01         | 7.65E-01         | 21326311                      | F-cell distribution            | 8.0x10 <sup>-06</sup> |               |
| rs3800569  | 7:138411425  | 8.35E-02        | 1.87E-01        | 6.62E-02        | 9.60E-01         | 8.36E-01         | 21326311                      | F-cell distribution            | 6.0x10 <sup>-06</sup> |               |
| rs11886868 | 2:60720246   | 4.72E-01        | 7.07E-01        | 9.19E-01        | <b>1.15E-110</b> | <b>1.71E-112</b> | 18245381                      | Fetal hemoglobin levels        | 7.0x10 <sup>-35</sup> |               |
| rs4910742  | 11:5306509   | 8.22E-02        | 4.60E-01        | 6.52E-01        | <b>4.26E-05</b>  | <b>9.19E-05</b>  | 18245381                      | Fetal hemoglobin levels        | 1.0x10 <sup>-21</sup> |               |
| rs5006884  | 11:5373251   | 1.51E-01        | <b>2.13E-03</b> | 6.96E-02        | <b>2.41E-02</b>  | <b>1.95E-02</b>  | 20018918                      | Fetal hemoglobin levels        | 3.0x10 <sup>-08</sup> | (African)     |
| rs766432   | 2:60719970   | 2.97E-01        | 7.07E-01        | 8.99E-01        | <b>3.96E-127</b> | <b>1.83E-129</b> | 20018918                      | Fetal hemoglobin levels        | 1.0x10 <sup>-29</sup> | (African)     |
| rs7950726  | 11:5225447   | 1.58E-01        | <b>7.46E-27</b> | <b>2.06E-14</b> | <b>4.08E-07</b>  | <b>5.71E-07</b>  | 23043469                      | HbA2 levels                    | 1.0x10 <sup>-11</sup> |               |
| rs10224002 | 7:151415041  | 1.50E-01        | 4.39E-01        | 9.21E-01        | 2.86E-01         | 2.52E-01         | 19862010                      | Hematocrit                     | 6.0x10 <sup>-15</sup> |               |
| rs11065987 | 12:112072424 | <b>3.57E-03</b> | 1.18E-01        | <b>1.87E-02</b> | <b>4.20E-02</b>  | 8.01E-02         | 19862010                      | Hematocrit                     | 1.0x10 <sup>-12</sup> |               |
| rs16926246 | 10:71093392  | <b>1.16E-07</b> | 2.10E-01        | <b>8.98E-04</b> | 5.16E-01         | 7.65E-01         | 19862010                      | Hematocrit                     | 1.0x10 <sup>-13</sup> |               |
| rs7385804  | 7:100235970  | <b>4.12E-02</b> | 8.27E-01        | 1.06E-01        | 2.72E-01         | 3.12E-01         | 19862010                      | Hematocrit                     | 4.0x10 <sup>-10</sup> |               |

|            |              |                 |                 |                 |                 |                 |          |                                      |                       |           |
|------------|--------------|-----------------|-----------------|-----------------|-----------------|-----------------|----------|--------------------------------------|-----------------------|-----------|
| rs9483788  | 6:135435501  | 4.42E-01        | <b>1.06E-15</b> | <b>1.61E-10</b> | <b>8.62E-72</b> | <b>1.41E-73</b> | 19862010 | Hematocrit                           | 3.0x10 <sup>-15</sup> |           |
| rs10168349 | 2:46360907   | <b>1.15E-02</b> | 8.31E-01        | 1.23E-01        | 3.51E-01        | 5.07E-01        | 20139978 | Hematological and biochemical traits | 5.0x10 <sup>-07</sup> | (Ht)      |
| rs10495928 | 2:46353166   | <b>1.12E-02</b> | 7.73E-01        | 1.11E-01        | 4.00E-01        | 5.65E-01        | 20139978 | Hematological and biochemical traits | 5.0x10 <sup>-06</sup> | (Hb)      |
| rs10518733 | 15:53940307  | 5.49E-01        | 7.51E-01        | 6.20E-01        | 6.66E-01        | 6.58E-01        | 20139978 | Hematological and biochemical traits | 2.0x10 <sup>-08</sup> | (sCr)     |
| rs1077834  | 15:58723479  | 2.52E-01        | 1.25E-01        | 4.54E-01        | 8.64E-01        | 9.17E-01        | 20139978 | Hematological and biochemical traits | 1.0x10 <sup>-14</sup> | (HDL)     |
| rs11709625 | 3:66823157   | 2.16E-01        | 9.78E-01        | 4.91E-01        | 3.22E-01        | 3.00E-01        | 20139978 | Hematological and biochemical traits | 1.0x10 <sup>-10</sup> | (BUN)     |
| rs1260326  | 2:27730940   | 6.83E-01        | 8.65E-01        | 5.96E-01        | 7.67E-01        | 7.09E-01        | 20139978 | Hematological and biochemical traits | 4.0x10 <sup>-09</sup> | (ALB)     |
| rs12678919 | 8:19844222   | 9.34E-01        | 4.66E-01        | 5.97E-01        | 5.91E-01        | 6.26E-01        | 20139978 | Hematological and biochemical traits | 9.0x10 <sup>-06</sup> | (HDL)     |
| rs2242420  | 1:21904529   | 6.95E-01        | 5.59E-01        | 6.42E-01        | 6.37E-01        | 6.37E-01        | 20139978 | Hematological and biochemical traits | 5.0x10 <sup>-13</sup> | (ALP)     |
| rs2280401  | 19:50000009  | 3.23E-01        | 5.92E-02        | 2.99E-01        | 5.57E-02        | <b>4.27E-02</b> | 20139978 | Hematological and biochemical traits | 3.0x10 <sup>-08</sup> | (TP)      |
| rs2896019  | 22:44333694  | 2.47E-01        | 7.24E-01        | 6.25E-01        | 2.60E-01        | 2.86E-01        | 20139978 | Hematological and biochemical traits | 2.0x10 <sup>-12</sup> | (ALT)     |
| rs3764261  | 16:56993324  | 4.36E-01        | 9.84E-01        | 7.07E-01        | 9.67E-01        | 8.75E-01        | 20139978 | Hematological and biochemical traits | 5.0x10 <sup>-29</sup> | (HDL)     |
| rs3782886  | 12:112110489 | NA              | NA              | NA              | NA              | NA              | 20139978 | Hematological and biochemical traits | 5.0x10 <sup>-09</sup> | (ALT)     |
| rs4273077  | 17:16849139  | 6.67E-01        | 4.87E-01        | 2.30E-01        | 5.25E-01        | 4.71E-01        | 20139978 | Hematological and biochemical traits | 3.0x10 <sup>-10</sup> | (TP)      |
| rs4890568  | 18:43231622  | 4.30E-01        | 6.85E-01        | 3.45E-01        | 4.85E-01        | 3.88E-01        | 20139978 | Hematological and biochemical traits | 2.0x10 <sup>-10</sup> | (BUN)     |
| rs495828   | 9:136154867  | <b>9.47E-03</b> | 6.69E-01        | 4.22E-01        | 6.80E-01        | 8.12E-01        | 20139978 | Hematological and biochemical traits | 4.0x10 <sup>-59</sup> | (ALP)     |
| rs5751902  | 22:24996630  | 1.88E-01        | 1.67E-01        | 7.74E-01        | 6.33E-01        | 5.95E-01        | 20139978 | Hematological and biochemical traits | 8.0x10 <sup>-20</sup> | (GGT)     |
| rs5756504  | 22:37467270  | 9.90E-02        | 7.93E-01        | 1.73E-01        | 3.28E-01        | 2.71E-01        | 20139978 | Hematological and biochemical traits | 2.0x10 <sup>-10</sup> | (Hb)      |
| rs671      | 12:112241766 | NA              | NA              | NA              | NA              | NA              | 20139978 | Hematological and biochemical traits | 5.0x10 <sup>-09</sup> | (GGT)     |
| rs6911965  | 6:24480295   | 3.36E-01        | 4.04E-01        | 8.32E-01        | 4.41E-01        | 5.16E-01        | 20139978 | Hematological and biochemical traits | 2.0x10 <sup>-11</sup> | (ALP)     |
| rs7136716  | 12:7691134   | 5.91E-01        | 7.15E-01        | 9.12E-01        | 3.26E-01        | 2.55E-01        | 20139978 | Hematological and biochemical traits | 3.0x10 <sup>-26</sup> | (CK)      |
| rs7173947  | 15:95270467  | 8.61E-02        | 5.36E-01        | 2.41E-01        | 8.38E-01        | 7.74E-01        | 20139978 | Hematological and biochemical traits | 3.0x10 <sup>-08</sup> | (ALP)     |
| rs7350481  | 11:116586283 | 2.44E-01        | 9.52E-02        | 4.31E-01        | 7.31E-01        | 8.75E-01        | 20139978 | Hematological and biochemical traits | 9.0x10 <sup>-10</sup> | (HDL)     |
| rs9820070  | 3:187687074  | 9.51E-01        | 9.52E-01        | 9.07E-01        | 5.07E-02        | <b>4.29E-02</b> | 20139978 | Hematological and biochemical traits | 1.0x10 <sup>-11</sup> | (BUN)     |
| rs11066301 | 12:112871372 | 5.95E-02        | 8.74E-02        | <b>3.59E-02</b> | 1.84E-01        | 2.65E-01        | 19820697 | Hematological parameters             | 8.0x10 <sup>-12</sup> | (PLT)     |
| rs11970772 | 6:41925290   | 4.53E-01        | 2.44E-01        | 2.84E-01        | 6.07E-01        | 6.12E-01        | 19820697 | Hematological parameters             | 7.0x10 <sup>-19</sup> | (MCV)     |
| rs17609240 | 17:38110689  | 3.11E-01        | 4.69E-01        | 2.81E-01        | 3.18E-01        | 3.11E-01        | 19820697 | Hematological parameters             | 9.0x10 <sup>-09</sup> | (WBC)     |
| rs2227139  | 6:32413459   | 7.74E-01        | 4.94E-01        | 5.56E-01        | 1.30E-01        | 1.62E-01        | 19820697 | Hematological parameters             | 1.0x10 <sup>-07</sup> | (WBC)     |
| rs385893   | 9:4763176    | 1.98E-01        | 5.45E-01        | 2.62E-01        | 8.82E-01        | 9.76E-01        | 19820697 | Hematological parameters             | 9.0x10 <sup>-17</sup> | (PLT)     |
| rs4947019  | 6:110090049  | 8.22E-01        | 9.07E-02        | 1.14E-01        | 8.04E-01        | 7.33E-01        | 19820697 | Hematological parameters             | 8.0x10 <sup>-06</sup> | (MCV)     |
| rs5756506  | 22:37467392  | 1.03E-01        | 7.54E-01        | 1.65E-01        | 2.97E-01        | 2.45E-01        | 19820697 | Hematological parameters             | 1.0x10 <sup>-09</sup> | (MCH)     |
| rs9402686  | 6:135427817  | 4.30E-01        | <b>1.56E-17</b> | <b>8.79E-12</b> | <b>1.47E-83</b> | <b>9.62E-86</b> | 19820697 | Hematological parameters             | 7.0x10 <sup>-42</sup> | (MCV)     |
| rs9609565  | 22:32867528  | 2.71E-01        | 3.90E-01        | 2.99E-01        | 1.07E-01        | 1.11E-01        | 19820697 | Hematological parameters             | 4.0x10 <sup>-10</sup> | (MCV)     |
| rs1211375  | 16:240280    | <b>1.11E-06</b> | <b>3.06E-13</b> | <b>2.37E-17</b> | 2.52E-01        | 1.71E-01        | 23263863 | Hematology traits                    | 7.0x10 <sup>-14</sup> | (RBC)     |
| rs174548   | 11:61571348  | 7.56E-01        | 7.33E-01        | 7.77E-01        | 9.51E-01        | 9.58E-01        | 23303382 | Hematology traits                    | 4.0x10 <sup>-08</sup> | (ALB/GLB) |
| rs2213169  | 11:5303063   | NA              | NA              | NA              | NA              | NA              | 23263863 | Hematology traits                    | 5.0x10 <sup>-11</sup> | (AA, HCT) |
| rs2340727  | 1:161946727  | 5.49E-02        | 1.80E-01        | 8.67E-01        | 5.95E-01        | 6.88E-01        | 23263863 | Hematology traits                    | 2.0x10 <sup>-23</sup> | (WBC)     |
| rs3130544  | 6:31058340   | 4.86E-01        | 3.88E-01        | 7.91E-01        | 6.70E-01        | 7.27E-01        | 23263863 | Hematology traits                    | 5.0x10 <sup>-07</sup> | (WBC)     |



|            |             |                 |                 |                 |                 |                 |          |                                           |                       |           |
|------------|-------------|-----------------|-----------------|-----------------|-----------------|-----------------|----------|-------------------------------------------|-----------------------|-----------|
| rs3761944  | 1:230388989 | 8.64E-02        | 4.72E-01        | 1.29E-01        | 8.85E-01        | 9.58E-01        | 23303382 | Hematology traits                         | 8.0x10 <sup>-06</sup> | (ALB/GLB) |
| rs389884   | 6:31940897  | 3.05E-01        | 8.19E-01        | 8.73E-01        | 1.61E-01        | 2.30E-01        | 23263863 | Hematology traits                         | 2.0x10 <sup>-08</sup> | (EA, WBC) |
| rs4561508  | 17:16848750 | 6.76E-01        | 4.80E-01        | 2.21E-01        | 5.50E-01        | 4.95E-01        | 23303382 | Hematology traits                         | 8.0x10 <sup>-24</sup> | (ALB/GLB) |
| rs4657616  | 1:158971086 | 3.67E-01        | 8.39E-01        | 5.75E-01        | 9.92E-01        | 9.38E-01        | 23263863 | Hematology traits                         | 5.0x10 <sup>-47</sup> | (AA, WBC) |
| rs5987027  | X:154014107 | NA              | NA              | NA              | NA              | NA              | 23263863 | Hematology traits                         | 1.0x10 <sup>-11</sup> | (AA, RBC) |
| rs5987027  | X:154014107 | NA              | NA              | NA              | NA              | NA              | 23263863 | Hematology traits                         | 1.0x10 <sup>-11</sup> | (AA, RBC) |
| rs6477998  | 9:115997249 | 7.96E-01        | 5.07E-01        | 8.01E-01        | 8.19E-01        | 8.77E-01        | 23303382 | Hematology traits                         | 8.0x10 <sup>-06</sup> | (ALB/GLB) |
| rs6927090  | 6:252145    | 3.83E-01        | 3.64E-01        | 2.95E-01        | 8.18E-01        | 8.98E-01        | 23303382 | Hematology traits                         | 4.0x10 <sup>-06</sup> | (ALB/GLB) |
| rs7203560  | 16:184390   | NA              | NA              | NA              | NA              | NA              | 23263863 | Hematology traits                         | 2.0x10 <sup>-08</sup> | (AA, HGB) |
| rs855791   | 22:37462936 | <b>1.36E-02</b> | <b>3.76E-02</b> | <b>1.43E-03</b> | <b>2.88E-02</b> | <b>1.54E-02</b> | 23263863 | Hematology traits                         | 3.0x10 <sup>-08</sup> | (HGB)     |
| rs9399137  | 6:135419018 | 1.58E-01        | <b>4.76E-19</b> | <b>7.67E-12</b> | <b>4.07E-91</b> | <b>1.10E-93</b> | 23263863 | Hematology traits                         | 3.0x10 <sup>-06</sup> | (RBC)     |
| rs6013509  | 20:51318351 | 8.51E-01        | 2.37E-01        | 4.07E-01        | 4.45E-01        | 4.80E-01        | 19862010 | Hemoglobin                                | 1.0x10 <sup>-10</sup> |           |
| rs10758658 | 9:4856877   | 2.34E-01        | 4.39E-01        | 7.06E-01        | 4.97E-01        | 5.19E-01        | 19862010 | Mean corpuscular hemoglobin               | 2.0x10 <sup>-14</sup> |           |
| rs10815094 | 9:4845520   | 4.46E-01        | 3.66E-01        | 5.36E-01        | 4.03E-01        | 4.03E-01        | 23263863 | Mean corpuscular hemoglobin               | 5.0x10 <sup>-06</sup> |           |
| rs11085824 | 19:13001547 | 5.04E-01        | 3.72E-01        | 7.53E-01        | <b>2.08E-03</b> | <b>3.36E-03</b> | 19862010 | Mean corpuscular hemoglobin               | 1.0x10 <sup>-11</sup> |           |
| rs11915082 | 3:195809139 | 8.32E-01        | 7.65E-01        | 9.31E-01        | <b>2.05E-02</b> | <b>1.66E-02</b> | 19862010 | Mean corpuscular hemoglobin               | 8.0x10 <sup>-13</sup> |           |
| rs11966072 | 6:109634828 | <b>3.83E-02</b> | 4.52E-01        | 1.49E-01        | 2.87E-01        | 3.01E-01        | 20139978 | Mean corpuscular hemoglobin               | 1.0x10 <sup>-08</sup> |           |
| rs12127588 | 1:198595506 | 4.38E-01        | 7.21E-01        | 5.11E-01        | 1.98E-01        | 1.97E-01        | 20139978 | Mean corpuscular hemoglobin               | 7.0x10 <sup>-10</sup> |           |
| rs218237   | 4:55394172  | 8.94E-02        | 2.37E-01        | 8.29E-02        | 6.19E-02        | 8.88E-02        | 20139978 | Mean corpuscular hemoglobin               | 3.0x10 <sup>-25</sup> |           |
| rs2279434  | 10:45955064 | 1.10E-01        | 8.65E-02        | <b>3.53E-02</b> | 4.43E-01        | 3.34E-01        | 20139978 | Mean corpuscular hemoglobin               | 4.0x10 <sup>-12</sup> |           |
| rs2858942  | 16:225653   | 3.93E-01        | 2.13E-01        | 5.03E-01        | 9.15E-01        | 8.56E-01        | 20139978 | Mean corpuscular hemoglobin               | 3.0x10 <sup>-09</sup> |           |
| rs470119   | 22:50966914 | 9.57E-01        | <b>1.65E-02</b> | <b>4.80E-02</b> | 7.37E-01        | 8.34E-01        | 20139978 | Mean corpuscular hemoglobin               | 4.0x10 <sup>-08</sup> |           |
| rs4916483  | 3:195907653 | 8.45E-02        | 5.84E-01        | 2.51E-01        | 9.96E-01        | 8.75E-01        | 20139978 | Mean corpuscular hemoglobin               | 4.0x10 <sup>-11</sup> |           |
| rs628751   | 6:139838419 | 8.31E-02        | <b>1.50E-03</b> | <b>8.29E-04</b> | 7.53E-01        | 7.68E-01        | 19862010 | Mean corpuscular hemoglobin               | 1.0x10 <sup>-17</sup> |           |
| rs632057   | 6:139834012 | 4.30E-01        | <b>9.80E-04</b> | <b>2.60E-03</b> | 5.70E-01        | 5.81E-01        | 20139978 | Mean corpuscular hemoglobin               | 1.0x10 <sup>-09</sup> |           |
| rs6494537  | 15:66051345 | 3.30E-01        | 1.14E-01        | 4.53E-01        | 3.42E-01        | 3.70E-01        | 20139978 | Mean corpuscular hemoglobin               | 3.0x10 <sup>-09</sup> |           |
| rs668459   | 6:139835689 | 3.29E-01        | <b>8.07E-04</b> | <b>1.65E-03</b> | 4.33E-01        | 4.26E-01        | 23263863 | Mean corpuscular hemoglobin               | 9.0x10 <sup>-09</sup> |           |
| rs7085433  | 10:51593354 | 4.67E-01        | 2.57E-01        | 6.41E-01        | 7.90E-01        | 7.88E-01        | 20139978 | Mean corpuscular hemoglobin               | 6.0x10 <sup>-10</sup> |           |
| rs7775698  | 6:135418635 | 2.47E-01        | <b>6.25E-19</b> | <b>3.53E-12</b> | <b>5.74E-88</b> | <b>8.84E-91</b> | 23263863 | Mean corpuscular hemoglobin               | 4.0x10 <sup>-13</sup> | (EA)      |
| rs9349205  | 6:41925159  | 3.62E-01        | <b>8.49E-09</b> | <b>1.77E-06</b> | 5.25E-02        | <b>4.41E-02</b> | 19862010 | Mean corpuscular hemoglobin               | 8.0x10 <sup>-20</sup> |           |
| rs1541252  | 1:203651927 | <b>2.61E-03</b> | 8.13E-01        | 2.76E-01        | 5.62E-01        | 6.65E-01        | 23263863 | Mean corpuscular hemoglobin concentration | 9.0x10 <sup>-08</sup> |           |
| rs2266928  | 16:580124   | <b>2.20E-06</b> | <b>1.65E-10</b> | <b>3.26E-14</b> | 6.98E-01        | 6.24E-01        | 23263863 | Mean corpuscular hemoglobin concentration | 3.0x10 <sup>-11</sup> |           |
| rs4580814  | 5:1113244   | 1.53E-01        | 6.97E-01        | 3.90E-01        | 2.81E-01        | 2.99E-01        | 20139978 | Mean corpuscular hemoglobin concentration | 5.0x10 <sup>-10</sup> |           |
| rs6684514  | 1:156255456 | 6.73E-01        | 7.88E-01        | 9.96E-01        | 3.28E-01        | 3.12E-01        | 20139978 | Mean corpuscular hemoglobin concentration | 3.0x10 <sup>-09</sup> |           |
| rs8176746  | 9:136131322 | 1.17E-01        | 1.30E-01        | 7.55E-02        | 5.62E-01        | 4.88E-01        | 20139978 | Mean corpuscular hemoglobin concentration | 4.0x10 <sup>-08</sup> |           |
| rs837763   | 16:88853729 | 6.89E-02        | 7.49E-01        | 2.14E-01        | 6.27E-01        | 6.46E-01        | 20139978 | Mean corpuscular hemoglobin concentration | 4.0x10 <sup>-13</sup> |           |
| rs11204538 | 1:248046272 | 6.89E-02        | 9.07E-01        | 3.36E-01        | 4.23E-01        | 3.82E-01        | 20139978 | Mean corpuscular volume                   | 2.0x10 <sup>-08</sup> |           |
| rs11239550 | 10:46024729 | 2.30E-01        | 7.85E-01        | 7.28E-01        | 4.95E-01        | 5.93E-01        | 19862010 | Mean corpuscular volume                   | 1.0x10 <sup>-10</sup> |           |

|            |              |                 |                 |                 |                 |                 |          |                              |                       |             |
|------------|--------------|-----------------|-----------------|-----------------|-----------------|-----------------|----------|------------------------------|-----------------------|-------------|
| rs12718597 | 7:50428428   | 8.85E-01        | 4.93E-01        | 4.37E-01        | <b>1.38E-02</b> | <b>1.76E-02</b> | 19862010 | Mean corpuscular volume      | 5.0x10 <sup>-13</sup> |             |
| rs131794   | 22:50971752  | 7.48E-01        | <b>6.93E-04</b> | <b>6.05E-03</b> | 6.82E-01        | 6.16E-01        | 19862010 | Mean corpuscular volume      | 1.0x10 <sup>-15</sup> |             |
| rs172629   | 4:55407762   | 7.76E-02        | 2.48E-01        | 8.02E-02        | 5.79E-02        | 8.52E-02        | 20139978 | Mean corpuscular volume      | 1.0x10 <sup>-27</sup> |             |
| rs198846   | 6:26107463   | <b>8.11E-03</b> | <b>1.24E-02</b> | <b>7.22E-04</b> | 8.55E-01        | 9.48E-01        | 20139978 | Mean corpuscular volume      | 2.0x10 <sup>-06</sup> |             |
| rs2236496  | 9:4844265    | 4.36E-01        | 3.54E-01        | 5.33E-01        | 4.37E-01        | 4.35E-01        | 23263863 | Mean corpuscular volume      | 2.0x10 <sup>-07</sup> |             |
| rs2540917  | 2:60608759   | 9.44E-01        | 7.92E-01        | 9.56E-01        | <b>1.49E-15</b> | <b>2.09E-15</b> | 19862010 | Mean corpuscular volume      | 1.0x10 <sup>-14</sup> |             |
| rs3218097  | 6:41905275   | 4.77E-01        | <b>5.32E-07</b> | <b>5.88E-05</b> | 7.00E-02        | 5.94E-02        | 23263863 | Mean corpuscular volume      | 9.0x10 <sup>-08</sup> |             |
| rs4466998  | 14:65475540  | 4.38E-01        | 1.45E-01        | 4.19E-01        | 4.50E-01        | 5.17E-01        | 19862010 | Mean corpuscular volume      | 5.0x10 <sup>-08</sup> |             |
| rs4821112  | 22:21964761  | 5.79E-01        | 8.09E-01        | 9.41E-01        | 4.14E-01        | 4.29E-01        | 20139978 | Mean corpuscular volume      | 1.0x10 <sup>-08</sup> |             |
| rs6092477  | 20:55991695  | 3.61E-01        | 9.75E-01        | 7.41E-01        | <b>7.64E-03</b> | <b>9.23E-03</b> | 20139978 | Mean corpuscular volume      | 1.0x10 <sup>-08</sup> |             |
| rs643381   | 6:139839423  | 8.31E-02        | <b>1.50E-03</b> | <b>8.29E-04</b> | 7.54E-01        | 7.68E-01        | 19862010 | Mean corpuscular volume      | 5.0x10 <sup>-25</sup> |             |
| rs7189020  | 16:304803    | 9.35E-02        | <b>9.32E-03</b> | <b>2.00E-03</b> | 2.59E-01        | 2.43E-01        | 19862010 | Mean corpuscular volume      | 2.0x10 <sup>-12</sup> |             |
| rs7255045  | 19:12932269  | 3.36E-01        | 9.31E-02        | 4.63E-01        | <b>4.51E-04</b> | <b>6.41E-04</b> | 19862010 | Mean corpuscular volume      | 2.0x10 <sup>-12</sup> |             |
| rs7786877  | 7:100214015  | 1.95E-01        | 7.17E-01        | 2.06E-01        | 9.84E-01        | 9.74E-01        | 19862010 | Mean corpuscular volume      | 3.0x10 <sup>-11</sup> |             |
| rs7843479  | 8:21820813   | 7.31E-01        | 5.00E-01        | 6.95E-01        | 5.44E-01        | 4.86E-01        | 20139978 | Mean corpuscular volume      | 3.0x10 <sup>-08</sup> |             |
| rs9374080  | 6:109616420  | 5.48E-02        | 1.32E-01        | <b>3.50E-02</b> | 4.62E-01        | 4.94E-01        | 19862010 | Mean corpuscular volume      | 4.0x10 <sup>-10</sup> |             |
| rs9859260  | 3:195800547  | 6.29E-01        | 8.93E-01        | 8.15E-01        | <b>1.63E-02</b> | <b>1.55E-02</b> | 19862010 | Mean corpuscular volume      | 8.0x10 <sup>-14</sup> |             |
| rs2075671  | 7:100345106  | 9.59E-01        | 4.67E-01        | 7.86E-01        | 7.74E-01        | 8.01E-01        | 19862010 | Other erythrocyte phenotypes | 1.0x10 <sup>-09</sup> | (RBC)       |
| rs857721   | 1:158612548  | 4.73E-01        | 4.70E-01        | 7.48E-01        | 8.21E-01        | 8.20E-01        | 19862010 | Other erythrocyte phenotypes | 1.0x10 <sup>-10</sup> | (MCHC)      |
| rs9373124  | 6:135423209  | 7.80E-01        | <b>2.92E-17</b> | <b>2.64E-12</b> | <b>3.55E-70</b> | <b>1.93E-72</b> | 19862010 | Other erythrocyte phenotypes | 7.0x10 <sup>-14</sup> | (MCHC)      |
| rs11611647 | 12:4333919   | 5.75E-01        | 9.36E-01        | 9.13E-01        | 6.35E-01        | 6.96E-01        | 20139978 | Red blood cell count         | 6.0x10 <sup>-09</sup> |             |
| rs2736100  | 5:1286516    | 7.93E-01        | 4.20E-01        | 5.37E-01        | 3.47E-01        | 3.45E-01        | 20139978 | Red blood cell count         | 3.0x10 <sup>-08</sup> |             |
| rs1008084  | 6:109626965  | 5.29E-02        | 1.25E-01        | <b>3.25E-02</b> | 5.15E-01        | 5.47E-01        | 23222517 | Red blood cell traits        | 6.0x10 <sup>-26</sup> | (EA, MCH)   |
| rs10159477 | 10:71099888  | <b>3.93E-07</b> | 5.02E-01        | <b>6.74E-03</b> | 3.10E-01        | 4.92E-01        | 23222517 | Red blood cell traits        | 4.0x10 <sup>-20</sup> | (EA, Hgb)   |
| rs10207392 | 2:111849659  | 7.90E-01        | 5.19E-01        | 4.41E-01        | 4.09E-01        | 4.13E-01        | 23222517 | Red blood cell traits        | 4.0x10 <sup>-11</sup> | (EA, MCV)   |
| rs10445033 | 16:88840462  | <b>1.14E-02</b> | 8.20E-01        | 2.27E-01        | 6.17E-01        | 5.84E-01        | 23222517 | Red blood cell traits        | 2.0x10 <sup>-22</sup> | (EA, MCHC)  |
| rs10480300 | 7:151406005  | 8.69E-02        | 6.52E-01        | 6.56E-01        | 5.47E-01        | 4.97E-01        | 23222517 | Red blood cell traits        | 8.0x10 <sup>-15</sup> | (EA, Hgb)   |
| rs1050828  | X:153764217  | NA              | NA              | NA              | NA              | NA              | 23696099 | Red blood cell traits        | 4.0x10 <sup>-13</sup> | (RBC count) |
| rs10849023 | 12:4332478   | 2.50E-01        | 9.74E-01        | 6.69E-01        | 4.57E-01        | 4.74E-01        | 23222517 | Red blood cell traits        | 8.0x10 <sup>-12</sup> | (EA, MCH)   |
| rs11072566 | 15:76293971  | <b>6.69E-03</b> | 6.60E-01        | 1.23E-01        | 4.16E-01        | 4.64E-01        | 23222517 | Red blood cell traits        | 3.0x10 <sup>-10</sup> | (EA, Hgb)   |
| rs11104870 | 12:88829294  | 9.38E-01        | 6.82E-02        | 1.48E-01        | 6.06E-01        | 5.72E-01        | 23222517 | Red blood cell traits        | 6.0x10 <sup>-11</sup> | (EA, RBCC)  |
| rs11190134 | 10:101282200 | 6.37E-01        | 7.01E-01        | 7.26E-01        | 9.58E-01        | 9.69E-01        | 23222517 | Red blood cell traits        | 1.0x10 <sup>-10</sup> | (EA, MCH)   |
| rs1122794  | 16:309155    | 8.26E-01        | 2.02E-01        | 3.84E-01        | 2.52E-01        | 2.97E-01        | 23446634 | Red blood cell traits        | 1.0x10 <sup>-08</sup> | (MCHC)      |
| rs11248850 | 16:163598    | <b>5.04E-03</b> | <b>2.25E-09</b> | <b>1.33E-09</b> | 3.87E-01        | 3.41E-01        | 23222517 | Red blood cell traits        | 6.0x10 <sup>-23</sup> | (EA, MCH)   |
| rs11627546 | 14:70365924  | 7.62E-01        | 4.96E-01        | 9.88E-01        | 8.06E-01        | 8.13E-01        | 23222517 | Red blood cell traits        | 1.0x10 <sup>-09</sup> | (EA, MCV)   |
| rs11717368 | 3:195834357  | 8.86E-01        | 4.09E-01        | 5.98E-01        | <b>4.74E-02</b> | <b>4.82E-02</b> | 23222517 | Red blood cell traits        | 7.0x10 <sup>-19</sup> | (EA, MCH)   |
| rs12530845 | 7:135329978  | 9.65E-01        | 5.75E-02        | 1.17E-01        | 8.03E-01        | 8.20E-01        | 23222517 | Red blood cell traits        | 3.0x10 <sup>-08</sup> | (MCH)       |
| rs12718598 | 7:50428445   | 4.89E-01        | <b>2.50E-03</b> | <b>1.49E-02</b> | <b>1.81E-02</b> | <b>2.76E-02</b> | 23222517 | Red blood cell traits        | 2.0x10 <sup>-13</sup> | (EA, MCV)   |

|            |              |                 |                 |                 |                 |                 |          |                       |                       |             |
|------------|--------------|-----------------|-----------------|-----------------|-----------------|-----------------|----------|-----------------------|-----------------------|-------------|
| rs13008603 | 2:46355848   | <b>2.94E-02</b> | 4.55E-01        | 5.89E-01        | 2.07E-01        | 1.79E-01        | 23446634 | Red blood cell traits | 4.0x10 <sup>-09</sup> | (Ht, AA)    |
| rs13335629 | 16:310380    | NA              | NA              | NA              | NA              | NA              | 23446634 | Red blood cell traits | 3.0x10 <sup>-23</sup> | (Hgb, AA)   |
| rs13339636 | 16:298588    | NA              | NA              | NA              | NA              | NA              | 23446634 | Red blood cell traits | 2.0x10 <sup>-34</sup> | (MCH, AA)   |
| rs140522   | 22:50971266  | 9.00E-01        | <b>7.32E-03</b> | <b>3.64E-02</b> | 8.25E-01        | 7.72E-01        | 23222517 | Red blood cell traits | 5.0x10 <sup>-23</sup> | (EA, MCV)   |
| rs1408272  | 6:25842951   | 6.70E-01        | 3.18E-01        | 4.43E-01        | 9.75E-01        | 9.61E-01        | 23222517 | Red blood cell traits | 5.0x10 <sup>-67</sup> | (EA, MCH)   |
| rs1532085  | 15:58683366  | 5.84E-01        | 9.17E-02        | 8.55E-02        | 9.87E-01        | 9.56E-01        | 23222517 | Red blood cell traits | 7.0x10 <sup>-11</sup> | (Hgb)       |
| rs17342717 | 6:25821770   | 5.40E-01        | <b>4.45E-02</b> | 1.04E-01        | 6.14E-01        | 6.79E-01        | 20927387 | Red blood cell traits | 5.0x10 <sup>-08</sup> | (MCH)       |
| rs17616316 | 14:103822762 | 3.24E-01        | 6.73E-01        | 9.09E-01        | 1.55E-01        | 1.45E-01        | 23222517 | Red blood cell traits | 8.0x10 <sup>-11</sup> | (MCH)       |
| rs1800562  | 6:26093141   | 9.59E-01        | 2.47E-01        | 2.63E-01        | 6.00E-01        | 6.84E-01        | 23446634 | Red blood cell traits | 4.0x10 <sup>-06</sup> | (Hgb, AA)   |
| rs2032314  | 21:35354523  | 1.73E-01        | 1.36E-01        | 8.99E-01        | 6.65E-01        | 8.58E-01        | 23222517 | Red blood cell traits | 8.0x10 <sup>-10</sup> | (PCV)       |
| rs2075672  | 7:100240296  | <b>3.79E-02</b> | 8.73E-01        | 1.14E-01        | 2.67E-01        | 3.07E-01        | 23222517 | Red blood cell traits | 2.0x10 <sup>-20</sup> | (EA, RBCC)  |
| rs218238   | 4:55395024   | 6.54E-02        | 5.53E-01        | 2.58E-01        | <b>2.03E-02</b> | <b>2.93E-02</b> | 23222517 | Red blood cell traits | 3.0x10 <sup>-39</sup> | (EA, RBCC)  |
| rs2413450  | 22:37470224  | <b>1.31E-02</b> | <b>3.17E-02</b> | <b>1.56E-03</b> | <b>1.26E-02</b> | <b>6.38E-03</b> | 23935956 | Red blood cell traits | 4.0x10 <sup>-07</sup> | (MCH)       |
| rs243070   | 2:60620286   | 6.83E-01        | 3.47E-01        | 6.44E-01        | <b>1.12E-08</b> | <b>1.53E-08</b> | 23222517 | Red blood cell traits | 4.0x10 <sup>-13</sup> | (EA, MCV)   |
| rs2572207  | 15:66070693  | 1.67E-01        | 8.76E-01        | 4.62E-01        | 7.05E-01        | 7.66E-01        | 23222517 | Red blood cell traits | 3.0x10 <sup>-09</sup> | (EA, MCV)   |
| rs3184504  | 12:111884608 | <b>5.55E-03</b> | 2.12E-01        | <b>4.58E-02</b> | <b>2.91E-02</b> | 5.56E-02        | 23222517 | Red blood cell traits | 4.0x10 <sup>-19</sup> | (EA, Hgb)   |
| rs3811444  | 1:248039451  | 8.72E-01        | 9.44E-01        | 9.47E-01        | 8.16E-01        | 6.49E-01        | 23222517 | Red blood cell traits | 5.0x10 <sup>-10</sup> | (EA, RBCC)  |
| rs3892630  | 19:33181484  | 5.52E-01        | 3.12E-01        | 3.59E-01        | 4.25E-01        | 3.93E-01        | 23222517 | Red blood cell traits | 1.0x10 <sup>-10</sup> | (EA, MCV)   |
| rs3916164  | 1:40069939   | 7.83E-01        | 8.51E-01        | 9.69E-01        | 7.16E-01        | 7.05E-01        | 23222517 | Red blood cell traits | 3.0x10 <sup>-10</sup> | (MCH)       |
| rs4820268  | 22:37469591  | <b>1.34E-02</b> | <b>4.87E-02</b> | <b>2.58E-03</b> | <b>1.46E-02</b> | <b>7.53E-03</b> | 20927387 | Red blood cell traits | 1.0x10 <sup>-12</sup> | (MCHC)      |
| rs4895441  | 6:135426573  | 5.83E-01        | <b>4.73E-18</b> | <b>2.08E-12</b> | <b>3.33E-82</b> | <b>1.34E-84</b> | 23935956 | Red blood cell traits | 3.0x10 <sup>-06</sup> | (MCV)       |
| rs4953318  | 2:46355051   | <b>2.01E-02</b> | 7.38E-01        | 1.02E-01        | 7.88E-01        | 9.79E-01        | 23222517 | Red blood cell traits | 3.0x10 <sup>-19</sup> | (EA, PCV)   |
| rs5749446  | 22:32880585  | 1.16E-01        | 9.07E-02        | 6.50E-02        | 2.99E-01        | 3.42E-01        | 23222517 | Red blood cell traits | 3.0x10 <sup>-13</sup> | (EA, MCH)   |
| rs5754217  | 22:21939675  | 6.82E-01        | 8.85E-01        | 9.39E-01        | 3.22E-01        | 3.43E-01        | 23222517 | Red blood cell traits | 9.0x10 <sup>-10</sup> | (EA, MCV)   |
| rs579459   | 9:136154168  | <b>1.58E-02</b> | 7.09E-01        | 4.78E-01        | 5.64E-01        | 6.79E-01        | 23222517 | Red blood cell traits | 9.0x10 <sup>-18</sup> | (EA, RBCC)  |
| rs590856   | 6:139844429  | 2.14E-01        | <b>1.32E-04</b> | <b>3.17E-04</b> | 5.07E-01        | 5.21E-01        | 23222517 | Red blood cell traits | 5.0x10 <sup>-36</sup> | (EA, MCV)   |
| rs6569992  | 6:135452152  | 3.11E-01        | <b>1.18E-12</b> | <b>2.92E-08</b> | <b>2.89E-56</b> | <b>4.85E-58</b> | 20927387 | Red blood cell traits | 6.0x10 <sup>-09</sup> | (RBC count) |
| rs6776003  | 3:141266493  | 9.02E-01        | 3.22E-01        | 2.96E-01        | 9.23E-01        | 9.13E-01        | 23222517 | Red blood cell traits | 4.0x10 <sup>-11</sup> | (EA, MCV)   |
| rs7120391  | 11:5230907   | NA              | NA              | NA              | NA              | NA              | 23696099 | Red blood cell traits | 5.0x10 <sup>-09</sup> | (MCHC)      |
| rs7155454  | 14:65502239  | 2.57E-01        | 1.11E-01        | 4.86E-01        | 4.16E-01        | 4.95E-01        | 23222517 | Red blood cell traits | 2.0x10 <sup>-12</sup> | (EA, MCH)   |
| rs7312105  | 12:2523355   | <b>4.35E-02</b> | 6.69E-01        | 2.19E-01        | 2.87E-01        | 3.22E-01        | 23222517 | Red blood cell traits | 3.0x10 <sup>-09</sup> | (EA, PCV)   |
| rs737092   | 20:55990405  | 5.97E-01        | 2.58E-01        | 3.36E-01        | 1.28E-01        | 1.63E-01        | 23222517 | Red blood cell traits | 4.0x10 <sup>-13</sup> | (EA, MCV)   |
| rs741702   | 19:13024250  | 8.31E-01        | 4.25E-01        | 6.77E-01        | <b>4.28E-02</b> | 5.68E-02        | 23222517 | Red blood cell traits | 8.0x10 <sup>-20</sup> | (EA, MCH)   |
| rs7529925  | 1:199007208  | 4.90E-01        | <b>3.23E-02</b> | <b>2.19E-02</b> | <b>2.20E-03</b> | <b>1.51E-03</b> | 23222517 | Red blood cell traits | 8.0x10 <sup>-09</sup> | (EA, RBCC)  |
| rs762516   | X:153764663  | NA              | NA              | NA              | NA              | NA              | 23446634 | Red blood cell traits | 2.0x10 <sup>-16</sup> | (Ht, AA)    |
| rs7776054  | 6:135418916  | 2.47E-01        | <b>3.71E-19</b> | <b>2.52E-12</b> | <b>9.14E-88</b> | <b>1.38E-90</b> | 23935956 | Red blood cell traits | 4.0x10 <sup>-06</sup> | (MCH)       |
| rs857684   | 1:158575729  | 4.43E-01        | 3.86E-01        | 2.15E-01        | 4.86E-01        | 4.13E-01        | 23222517 | Red blood cell traits | 4.0x10 <sup>-16</sup> | (EA, MCHC)  |
| rs901683   | 10:45966422  | 5.45E-02        | 1.65E-01        | <b>4.99E-02</b> | 9.13E-01        | 7.46E-01        | 23222517 | Red blood cell traits | 2.0x10 <sup>-16</sup> | (EA, MCV)   |

|           |             |                 |                 |                 |                 |                 |          |                       |                       |           |
|-----------|-------------|-----------------|-----------------|-----------------|-----------------|-----------------|----------|-----------------------|-----------------------|-----------|
| rs9310736 | 3:24350811  | 5.68E-01        | <b>3.32E-02</b> | 5.52E-02        | 1.93E-01        | 1.64E-01        | 23222517 | Red blood cell traits | $6.0 \times 10^{-16}$ | (EA, MCV) |
| rs9349204 | 6:41914378  | 6.65E-01        | <b>1.34E-06</b> | <b>1.22E-04</b> | 1.06E-01        | 8.75E-02        | 23222517 | Red blood cell traits | $2.0 \times 10^{-40}$ | (EA, MCV) |
| rs9386791 | 6:109608497 | <b>4.66E-02</b> | 2.85E-01        | 8.42E-02        | 4.41E-01        | 4.56E-01        | 23446634 | Red blood cell traits | $1.0 \times 10^{-08}$ | (MCH, AA) |
| rs9389269 | 6:135427159 | 5.03E-01        | <b>2.04E-17</b> | <b>7.32E-12</b> | <b>2.23E-83</b> | <b>1.17E-85</b> | 23222517 | Red blood cell traits | $3.0 \times 10^{-19}$ | (EA, MCV) |
| rs9494145 | 6:135432552 | 5.43E-01        | <b>5.67E-16</b> | <b>7.74E-11</b> | <b>3.94E-72</b> | <b>3.81E-74</b> | 20927387 | Red blood cell traits | $3.0 \times 10^{-15}$ | (MCV)     |
| rs9924561 | 16:314780   | NA              | NA              | NA              | NA              | NA              | 23696099 | Red blood cell traits | $5.0 \times 10^{-29}$ | (MCV)     |

**Supplementary Table 7. Genome-wide significant signals using 1000 Genomes phase III as reference panel.**

The table shows the association results at the genome-wide significant loci (all results are corrected for  $\beta^0$  mutations observed in the *HBB* gene, see **Online Methods**). At each locus, we indicate the chromosome and genomic position (hg19 build), rs ID when available, effect allele tested for association (EA) and the other allele at the SNP (OA), the SNP effect allele frequency (EAF), the regression coefficients and imputation accuracy (RSQR).

| SNP                        | rsID (dbSNP142)         | chr:pos                   | Nearest Gene               | EA / OA | EAF   | p-value                 | Effect (StdErr) | RSQR      | Type       |
|----------------------------|-------------------------|---------------------------|----------------------------|---------|-------|-------------------------|-----------------|-----------|------------|
| <b>HbA1 (g/dl)</b>         |                         |                           |                            |         |       |                         |                 |           |            |
| locus1 <sup>1</sup>        | rs570013781             | 16:149539                 | <i>NPRL3</i>               | A/G     | 0.136 | 5.87x10 <sup>-18</sup>  | 0.200 (0.023)   | 0.886     | intron     |
|                            | rs72759456              | 16:960792 (cond.)         | <i>LMF1</i>                | T/C     | 0.019 | 1.76x10 <sup>-8</sup>   | -0.260 (0.046)  | 0.976     | intron     |
| locus2                     | rs5030868               | X:153762634               | <i>G6PD</i>                | A/G     | 0.085 | 2.78x10 <sup>-11</sup>  | -0.1256 (0.019) | Genotyped | exon       |
| locus3 <sup>2</sup>        | rs142385463             | 12:124632597 <sup>2</sup> | <i>ZNF664-FAM101A</i>      | A/G     | 0.010 | 1.87x10 <sup>-08</sup>  | -0.680 (0.121)  | 0.657     | intron     |
| <b>HbA2</b>                |                         |                           |                            |         |       |                         |                 |           |            |
| locus1 (%)                 | rs35152987              | 11:5255582                | <i>HBD</i>                 | A/C     | 0.004 | 3.43x10 <sup>-67</sup>  | -2.483 (0.142)  | 0.987     | missense   |
|                            | rs56778108              | 11:5252628 (cond.)        | <i>HBB-HBD</i>             | G/T     | 0.006 | 4.33x10 <sup>-39</sup>  | -1.27 (0.096)   | 0.872     | intergenic |
|                            | rs12799332              | 11:5232243 (cond.)        | <i>OR51V1-HBB</i>          | G/C     | 0.181 | 2.77x10 <sup>-37</sup>  | -0.241 (0.019)  | 0.999     | intergenic |
|                            | rs11036338              | 11:5242698 (cond.)        | <i>OR51V1-HBB</i>          | C/G     | 0.376 | 7.19x10 <sup>-14</sup>  | 0.127 (0.017)   | 0.969     | intergenic |
|                            | rs7936823               | 11:5250168 (cond.)        | <i>HBB-HBD</i>             | G/A     | 0.435 | 1.89x10 <sup>-10</sup>  | 0.111 (0.017)   | 0.751     | intergenic |
| locus2 <sup>1</sup> (g/dl) | rs141494605             | 16:216593                 | <i>HBM</i>                 | C/T     |       | 3.95x10 <sup>-35</sup>  | 0.308 (0.025)   | 0.878     | synonymous |
|                            | rs72759455              | 16:960158 (cond.)         | <i>LMF1</i>                | T/C     | 0.019 | 1.27x10 <sup>-08</sup>  | -0.290 (0.051)  | 0.972     | intron     |
| locus3 (%)                 | rs13205177              | 6:41749829                | <i>PRICKLE4</i>            | A/G     | 0.126 | 8.91x10 <sup>-28</sup>  | 0.335 (0.031)   | 0.930     | intron     |
| locus4 (%)                 | rs7776054               | 6:135418916               | <i>HBS1L-MYB</i>           | G/A     | 0.210 | 1.60x10 <sup>-20</sup>  | 0.231 (0.025)   | Genotyped | intergenic |
| locus5 (%)                 | rs73307913              | 20:44548301               | <i>PLTP-PCIF1</i>          | C/T     | 0.135 | 1.83x10 <sup>-09</sup>  | -0.180 (0.030)  | 1.000     | intergenic |
| locus6 (%)                 | rs141006889             | 16:88601281               | <i>FOG1</i>                | G/A     | 0.007 | 5.33x10 <sup>-09</sup>  | -0.507 (0.087)  | Genotyped | missense   |
| <b>HbF (g/dl)</b>          |                         |                           |                            |         |       |                         |                 |           |            |
| locus1                     | rs1427407               | 2:60718043                | <i>BCL11A</i>              | T/G     | 0.143 | 2.37x10 <sup>-120</sup> | 0.662 (0.028)   | Genotyped | intron     |
|                            | rs7599488               | 2:60718347 (cond.)        | <i>BCL11A</i>              | T/C     | 0.376 | 2.42x10 <sup>-32</sup>  | 0.204 (0.017)   | 0.980     | intron     |
| locus2                     | rs9399137               | 6:135419018               | <i>HBS1L-MYB</i>           | C/T     | 0.205 | 4.88x10 <sup>-83</sup>  | 0.485 (0.025)   | Genotyped | intergenic |
|                            | rs1854865               | 6:135360300 (cond.)       | <i>HBS1L</i>               | G/C     | 0.373 | 1.10x10 <sup>-11</sup>  | -0.141 (0.021)  | 0.979     | intron     |
| locus3                     | rs67385638              | 11:5290370                | <i>HBE1</i>                | G/C     | 0.236 | 1.96x10 <sup>-24</sup>  | 0.242 (0.024)   | 0.988     | intron     |
|                            | rs1143541               | 11:5269330 (cond.)        | <i>HBBP1-HBG1</i>          | A/T     | 0.023 | 1.48x10 <sup>-11</sup>  | 0.403 (0.060)   | 0.865     | intergenic |
| locus4 <sup>3</sup>        | rs10031426 <sup>3</sup> | 4:181734569               | <i>LINC01098-LINC00290</i> | G/A     | 0.362 | 1.78x10 <sup>-08</sup>  | -0.130 (0.023)  | 0.800     | intergenic |

<sup>1</sup> = association results locally corrected for the  $-\alpha$  3.7 deletion type I (NG\_000006.1:g.34164\_37967del3804) (see **Online Methods**).

<sup>2</sup> = rs142385463 and the novel variant identified using the SardiNIA cohort (chr12:123681790) represent the same signal: corrected p-value for 12:123681790 is indeed 0.03 when using rs142385463 as a covariate (see Locus 3 on **Supplementary Figure 3**).

<sup>3</sup> = association at SNP rs10031426 was not confirmed when imputing using the SardiNIA reference panel ( $p=1.76 \times 10^{-06}$ ), whereas it provided a greater imputation quality than the 1000Genomes reference panel (RSQR = 0.97 versus 0.80).

**Supplementary Table 8. Evidence of relationships between suggestive and genome-wide significant loci.**

The table shows results from GRAIL analysis<sup>31</sup> carried out for variants associated with p-values between  $1.00 \times 10^{-04}$  and  $5.00 \times 10^{-08}$ , searching for their relationships with genome-wide associated loci in 3 different databases (see **Online Methods**). Bolded genes occur in more than one dataset report. Only multiple hypothesis-corrected p-values below 0.05 are reported.

| Database                            | Gene                  | Corrected p-value      | Associated traits |
|-------------------------------------|-----------------------|------------------------|-------------------|
| Pubmed (2006)                       |                       |                        |                   |
|                                     | <b>NFE2</b>           | $6.93 \times 10^{-14}$ | HbA2              |
|                                     | <b>HBM</b>            | $1.73 \times 10^{-10}$ | HbA2              |
|                                     | <b>HBB</b>            | $2.90 \times 10^{-08}$ | HbF               |
|                                     | <b>SPTB</b>           | $1.45 \times 10^{-07}$ | HbA1              |
|                                     | FOG1                  | $5.10 \times 10^{-03}$ | HbA2              |
|                                     | KLF2                  | $5.49 \times 10^{-03}$ | HbA1              |
|                                     | MYB                   | $5.82 \times 10^{-03}$ | HbF               |
|                                     | <b>ANK1</b>           | $5.83 \times 10^{-03}$ | HbA1              |
|                                     | PLA2G4E               | $1.33 \times 10^{-02}$ | HbA1              |
|                                     | <b>RGS7</b>           | $2.04 \times 10^{-02}$ | HbF               |
|                                     | ART4                  | $3.59 \times 10^{-02}$ | HbA2              |
|                                     | EVI2B                 | $4.36 \times 10^{-02}$ | HbA1              |
| Gene Ontology <sup>32</sup>         |                       |                        |                   |
|                                     | ADGB                  | $7.36 \times 10^{-13}$ | HbA2              |
|                                     | HBD                   | $2.61 \times 10^{-08}$ | HbF               |
|                                     | <b>HBM, HBQ1, HBZ</b> | $8.07 \times 10^{-08}$ | HbA2              |
|                                     | CYBA                  | $3.87 \times 10^{-05}$ | HbA2              |
|                                     | FADS2                 | $3.87 \times 10^{-03}$ | HbA2              |
|                                     | PSME4                 | $4.23 \times 10^{-03}$ | HbF               |
|                                     | <b>RGS7</b>           | $1.12 \times 10^{-02}$ | HbF               |
|                                     | CARD11                | $1.46 \times 10^{-02}$ | HbA2              |
|                                     | STARD13               | $1.49 \times 10^{-02}$ | HbF               |
| Gene Expression Atlas <sup>33</sup> |                       |                        |                   |
|                                     | <b>ANK1</b>           | $2.04 \times 10^{-06}$ | HbA1              |
|                                     | GLRX5                 | $9.98 \times 10^{-06}$ | HbA2              |
|                                     | <b>SPTB</b>           | $3.04 \times 10^{-05}$ | HbA1              |
|                                     | CYBRD1                | $9.22 \times 10^{-05}$ | HbF               |
|                                     | EPB42                 | $1.04 \times 10^{-04}$ | HbA1              |
|                                     | HBA1                  | $1.40 \times 10^{-04}$ | HbA2              |
|                                     | <b>HBB</b>            | $2.11 \times 10^{-04}$ | HbF               |
|                                     | <b>NFE2</b>           | $2.98 \times 10^{-04}$ | HbA2              |
|                                     | XPO7                  | $3.52 \times 10^{-03}$ | HbA2              |
|                                     | TFDP2                 | $3.91 \times 10^{-02}$ | HbA2              |
|                                     | RANBP3                | $4.26 \times 10^{-02}$ | HbF               |
|                                     | RSAD2                 | $4.39 \times 10^{-02}$ | HbA1              |

**Supplementary Table 9. Markers associated with suggestive p-values to a single trait and demonstrating genome-wide significant pleiotropic effects considering between-trait combined p-values.**

The table shows markers with a between-trait combined p-value  $<5 \times 10^{-8}$ . For each SNP, we report chromosome and position in build 37, the corresponding rs ID when available, the effect allele and the other, the effect allele frequency, the imputation accuracy, the effect size and its standard deviation and p-value for each hemoglobin, the between traits combined p-values, and the nearest gene with the indication of the SNP location. Pleiotropy of signals that are already genome-wide significant with one trait is reported in **Table 1**.

| chromosome:<br>position | dbSNP 142   | EA/OA | EAF    | RSQR      | HbA1(g/dl)      |                        | HbA2(g/dl)      |                        | Combined<br>p-value    | Gene (SNP location)                     |
|-------------------------|-------------|-------|--------|-----------|-----------------|------------------------|-----------------|------------------------|------------------------|-----------------------------------------|
|                         |             |       |        |           | Effect (StdErr) | p-value                | Effect (StdErr) | p-value                |                        |                                         |
| 12:125860716            | rs534082394 | A/G   | 0.006  | 0.959     | -0.443 (0.083)  | $9.57 \times 10^{-08}$ | -0.390 (0.092)  | $2.51 \times 10^{-05}$ | $1.18 \times 10^{-11}$ | <i>TMEM132B</i> (intronic)              |
| 7:42298663              | rs73098313  | A/G   | 0.199  | 0.985     | -0.068 (0.016)  | $2.53 \times 10^{-05}$ | -0.090 (0.018)  | $6.02 \times 10^{-07}$ | $1.05 \times 10^{-10}$ | <i>GLI3 / LOC101928795</i> (intergenic) |
| 4:75545480              | rs13137956  | G/A   | 0.018  | 0.948     | 0.226 (0.048)   | $2.57 \times 10^{-06}$ | 0.230 (0.054)   | $1.73 \times 10^{-05}$ | $1.94 \times 10^{-10}$ | <i>AREGB / BTC</i> (intergenic)         |
| 13:111100266            | rs4132608   | A/G   | 0.140  | Genotyped | -0.078 (0.019)  | $3.16 \times 10^{-05}$ | -0.096 (0.021)  | $3.36 \times 10^{-06}$ | $5.79 \times 10^{-10}$ | <i>COL4A2</i> (intronic)                |
| 5:180097967             | rs72821020  | A/T   | 0.081  | 0.960     | 0.099 (0.024)   | $3.84 \times 10^{-05}$ | 0.120 (0.026)   | $6.23 \times 10^{-06}$ | $1.21 \times 10^{-09}$ | <i>LOC100420514 / FLT4</i> (intergenic) |
| 1:158763983             | rs857854    | T/C   | 0.479  | Genotyped | 0.057 (0.013)   | $1.21 \times 10^{-05}$ | 0.058 (0.014)   | $5.67 \times 10^{-05}$ | $2.85 \times 10^{-09}$ | <i>OR2AQ1P / OR6N2</i> (intergenic)     |
| 7:138935064             | rs541069630 | G/C   | 0.0098 | 0.984     | -0.278 (0.067)  | $3.35 \times 10^{-05}$ | -0.310 (0.074)  | $3.08 \times 10^{-05}$ | $4.44 \times 10^{-09}$ | <i>UBN2</i> (intronic)                  |
| 5:153856095             | rs149968351 | T/C   | 0.021  | 0.992     | -0.175 (0.045)  | $9.59 \times 10^{-05}$ | -0.219 (0.050)  | $1.10 \times 10^{-05}$ | $5.37 \times 10^{-09}$ | <i>HAND1</i> (intronic)                 |
| 4:117943991             | na          | A/G   | 0.020  | 0.963     | -0.189 (0.046)  | $4.28 \times 10^{-05}$ | -0.214 (0.052)  | $3.54 \times 10^{-05}$ | $6.57 \times 10^{-09}$ | <i>TRAM1L1 / MIR1973</i> (intergenic)   |
| 8:144627241             | rs12543282  | T/C   | 0.271  | 0.980     | -0.062 (0.015)  | $3.20 \times 10^{-05}$ | -0.067 (0.016)  | $5.08 \times 10^{-05}$ | $6.81 \times 10^{-09}$ | <i>ZC3H3</i> (upstream, 3621bp)         |
| 6:158635446             | rs36109109  | T/G   | 0.095  | 0.994     | 0.090 (0.022)   | $4.46 \times 10^{-05}$ | 0.097 (0.024)   | $7.50 \times 10^{-05}$ | $1.36 \times 10^{-08}$ | <i>TULP4 / GTF2H5</i> (intergenic)      |
| 9:3676290               | rs55798071  | A/T   | 0.052  | 0.909     | -0.124 (0.030)  | $4.09 \times 10^{-05}$ | -0.131 (0.033)  | $9.26 \times 10^{-05}$ | $1.51 \times 10^{-08}$ | <i>LOC101929302</i> (intronic)          |
| 5:111884585             | rs6890241   | T/C   | 0.208  | 0.998     | -0.062 (0.016)  | $8.53 \times 10^{-05}$ | -0.072 (0.018)  | $4.99 \times 10^{-05}$ | $1.84 \times 10^{-08}$ | <i>LOC100286958 / APC</i> (intergenic)  |
| 7:124913422             | rs139891547 | C/T   | 0.038  | 0.952     | 0.139 (0.035)   | $5.90 \times 10^{-05}$ | 0.153 (0.039)   | $8.66 \times 10^{-05}$ | $2.08 \times 10^{-08}$ | <i>LOC101928283</i> (intronic)          |

**Supplementary Table 10. Summary of Extended Association for  $\beta^039$ .**

The table describes phenotypes that show association at Bonferroni level with the  $\beta^039$  mutation. For each trait we show summary statistics for the distribution in the full cohort, as well as the association coefficients (effect size in standard deviation units and its standard error) for the T allele, and the p-value.

| Trait                                 | Trait distribution |           | Association with $\beta^039$ (rs11549407) |                     |
|---------------------------------------|--------------------|-----------|-------------------------------------------|---------------------|
|                                       | Mean               | Std. Dev. | Effect (StdErr)                           | p-value             |
| Total Cholesterol (mg/dl)             | 208.4              | 42.3      | -0.49 (0.050)                             | $7 \times 10^{-22}$ |
| LDL-Cholesterol (mg/dl)               | 126.6              | 35.4      | -0.47 (0.051)                             | $1 \times 10^{-20}$ |
| Bilirubin, total(mg/dl)               | 0.69               | 0.39      | 0.39 (0.047)                              | $5 \times 10^{-17}$ |
| Bilirubin, fractioned (mg/dl)         | 0.13               | 0.08      | 0.29 (0.046)                              | $1 \times 10^{-10}$ |
| White Blood Cell Count ( $10^6$ /mmc) | 6.674              | 1.680     | 0.24 (0.047)                              | $3 \times 10^{-7}$  |
| Neutrophil Count ( $10^6$ /mmc)       | 3.817              | 1.296     | 0.23 (0.048)                              | $1 \times 10^{-6}$  |
| Transferrin Levels (mg/dl)            | 307.4              | 62.9      | -0.19 (0.047)                             | $6 \times 10^{-5}$  |
| Serum Fibrinogen(mg/dl)               | 329.2              | 67.6      | -0.18 (0.045)                             | $7 \times 10^{-5}$  |
| HDL Cholesterol (mg/dl)               | 64.2               | 14.9      | -0.18 (0.045)                             | $9 \times 10^{-5}$  |
| Platelets Count ( $10^3$ /mmc)        | 243.6              | 60.1      | 0.18 (0.047)                              | $9 \times 10^{-5}$  |



**Supplementary Table 11. Effects of genome-wide significant loci in males and females.**

The table shows association in males and females separately, for the 23 lead variants. Last column shows p-value for heterogeneity of effects. None of the SNPs passed Bonferroni correction for significance in heterogeneity ( $0.002 = 0.05/23$ ).

| SNPtype                       | EA/OA         | Males  |        |                         | Females |        |                         | Heterogeneity |
|-------------------------------|---------------|--------|--------|-------------------------|---------|--------|-------------------------|---------------|
|                               |               | Effect | StdErr | p-value                 | Effect  | StdErr | p-value                 | p-value       |
| <b>HBA1</b>                   |               |        |        |                         |         |        |                         |               |
| $\beta^039$ (rs11549407)      | T/C           | -1.769 | 0.052  | $6.21 \times 10^{-249}$ | -1.642  | 0.049  | $6.09 \times 10^{-242}$ | 0.071         |
| $-\alpha$ 3.7 deletion type I | del/wild-type | -0.317 | 0.038  | $8.61 \times 10^{-17}$  | -0.281  | 0.036  | $9.99 \times 10^{-15}$  | 0.493         |
| rs570013781                   | A/G           | -0.326 | 0.041  | $2.13 \times 10^{-15}$  | -0.248  | 0.038  | $5.58 \times 10^{-11}$  | 0.162         |
| chr16:391593                  | T/C           | -0.700 | 0.109  | $1.15 \times 10^{-10}$  | -0.458  | 0.093  | $9.63 \times 10^{-7}$   | 0.092         |
| rs5030868                     | A/G           | -0.152 | 0.028  | $5.72 \times 10^{-8}$   | -0.170  | 0.038  | $6.46 \times 10^{-6}$   | 0.700         |
| chr12:123681790               | A/C           | -0.488 | 0.107  | $4.71 \times 10^{-6}$   | -0.478  | 0.107  | $8.81 \times 10^{-6}$   | 0.947         |
| <b>HBA2</b>                   |               |        |        |                         |         |        |                         |               |
| $\beta^039$ (rs11549407)      | T/C           | 1.942  | 0.050  | $<1 \times 10^{-300}$   | 1.945   | 0.046  | $<1 \times 10^{-300}$   | 1.000         |
| rs35152987                    | A/C           | -2.107 | 0.150  | $8.15 \times 10^{-45}$  | -2.136  | 0.150  | $5.75 \times 10^{-46}$  | 0.887         |
| rs7944544                     | T/G           | -1.325 | 0.151  | $2.05 \times 10^{-18}$  | -1.256  | 0.120  | $8.77 \times 10^{-26}$  | 0.717         |
| rs12793110                    | T/C           | -0.222 | 0.028  | $1.14 \times 10^{-15}$  | -0.272  | 0.024  | $5.65 \times 10^{-31}$  | 0.169         |
| rs11036338                    | C/G           | 0.153  | 0.024  | $7.37 \times 10^{-11}$  | 0.120   | 0.021  | $1.20 \times 10^{-8}$   | 0.296         |
| rs7936823                     | G/A           | 0.083  | 0.022  | $1.79 \times 10^{-4}$   | 0.129   | 0.019  | $1.32 \times 10^{-11}$  | 0.113         |
| $-\alpha$ 3.7 deletion type I | del/wild-type | -0.215 | 0.037  | $6.17 \times 10^{-9}$   | -0.222  | 0.034  | $7.46 \times 10^{-11}$  | 0.889         |
| rs141494605                   | C/T           | -0.423 | 0.038  | $1.02 \times 10^{-28}$  | -0.340  | 0.036  | $4.41 \times 10^{-21}$  | 0.113         |
| chr16:391593                  | T/C           | -0.726 | 0.104  | $2.59 \times 10^{-12}$  | -0.520  | 0.088  | $3.78 \times 10^{-9}$   | 0.131         |
| rs148706947                   | T/C           | 0.472  | 0.077  | $8.01 \times 10^{-10}$  | 0.257   | 0.070  | $2.63 \times 10^{-4}$   | 0.039         |
| rs113267280                   | G/T           | 0.268  | 0.035  | $2.35 \times 10^{-14}$  | 0.271   | 0.033  | $1.33 \times 10^{-16}$  | 0.950         |
| rs7776054                     | G/A           | 0.211  | 0.026  | $1.22 \times 10^{-15}$  | 0.148   | 0.024  | $6.00 \times 10^{-10}$  | 0.077         |
| rs59329875                    | C/T           | -0.135 | 0.033  | $3.69 \times 10^{-5}$   | -0.123  | 0.028  | $1.07 \times 10^{-5}$   | 0.780         |
| rs141006889                   | G/A           | -0.528 | 0.133  | $7.60 \times 10^{-05}$  | -0.453  | 0.124  | $2.5 \times 10^{-04}$   | 0.680         |
| <b>HbF</b>                    |               |        |        |                         |         |        |                         |               |
| $\beta^039$ (rs11549407)      | T/C           | 1.137  | 0.052  | $8.99 \times 10^{-107}$ | 1.159   | 0.048  | $5.42 \times 10^{-127}$ | 0.777         |
| rs4671393                     | A/G           | 0.507  | 0.032  | $8.46 \times 10^{-56}$  | 0.626   | 0.028  | $6.34 \times 10^{-110}$ | 0.005         |
| rs13019832                    | A/G           | -0.179 | 0.023  | $1.45 \times 10^{-14}$  | -0.222  | 0.020  | $8.27 \times 10^{-28}$  | 0.163         |
| rs9399137                     | C/T           | 0.373  | 0.027  | $5.42 \times 10^{-44}$  | 0.440   | 0.025  | $6.09 \times 10^{-72}$  | 0.065         |
| rs11754265                    | C/G           | -0.146 | 0.028  | $2.69 \times 10^{-7}$   | -0.145  | 0.025  | $1.01 \times 10^{-8}$   | 0.979         |
| rs67385638                    | G/C           | 0.216  | 0.027  | $9.44 \times 10^{-16}$  | 0.202   | 0.024  | $1.35 \times 10^{-17}$  | 0.696         |
| rs2855122                     | C/T           | -0.110 | 0.031  | $3.28 \times 10^{-4}$   | -0.123  | 0.027  | $6.97 \times 10^{-6}$   | 0.752         |
| rs183437571                   | T/C           | 0.555  | 0.121  | $4.32 \times 10^{-6}$   | 0.397   | 0.102  | $1.05 \times 10^{-4}$   | 0.318         |
